# Supplementary material for: Anthropogenic and geogenic influences on peri-urban aquifers in semi-arid regions: insights from a case study in northeast Jaipur, Rajasthan, India
Source: Springer Nature journal article supplement (doi:10.1007/s10040-021-02301-7), 2021-02-02
Supplement: MOESM1 [file 18827580]

**Anthropogenic and geogenic influences on peri-urban aquifers in semi-arid regions: insights from a case study in northeast Jaipur, Rajasthan, India**

Theresa Frommen<sup>1\*</sup>, Maike Groeschke<sup>2</sup>, Maximilian Nölscher<sup>2</sup>, Paul Koeniger<sup>2</sup>, Michael Schneider<sup>1</sup>

<sup>1</sup> Freie Universitaet Berlin, Hydrogeology Group, Malteserstr.74-100, 12249 Berlin, Germany

<sup>2</sup> BGR - Federal Institute for Geosciences and Natural Resources, Hannover and Berlin, Germany

\*corresponding author: [theresa.frommen@hu-berlin.de](mailto:theresa.frommen@hu-berlin.de)

**Table S1** Details of the field tests.

| Parameter                     | Unit   | Method                                      | Measuring range | Error              | Test number (Merck) |
|-------------------------------|--------|---------------------------------------------|-----------------|--------------------|---------------------|
| HCO <sub>3</sub> <sup>-</sup> | mmol/L | titrimetric with titration pipette          | 0.1 - 10        | ±0.2               | 111109              |
| NH <sub>4</sub> <sup>+</sup>  | mg/L   | colorimetric with color-disk comparator     | 0.2 - 8.0       | semiquantitatively | 114750              |
|                               | mg/L   | colorimetric with color-card                | 0.025 - 0.4     | semiquantitatively | 114428              |
| NO <sub>2</sub> <sup>-</sup>  | mg/L   | colorimetric with color card and sliding    | 0.025 - 0.5     | semiquantitatively | 108025              |
| NO <sub>3</sub> <sup>-</sup>  | mg/L   | colorimetric with color card and sliding    | 10 - 150        | semiquantitatively | 111170              |
|                               | mg/L   | colorimetric with test strips               | 10 - 500        | semiquantitatively | 110020              |
| S <sub>2</sub> <sup>-</sup>   | mg/L   | colorimetric with color card and comparator | 0.02 – 0.025    | semiquantitatively | 114416              |

**Table S2** Hydrochemical Results.

| Well ID | Sub-group     | Date     | T<br>[°C] | EC<br>[μS/cm] | pH   | ORP<br>[mV] | O2<br>[mg/l] | NO2<br>[mg/l] | NH4<br>[mg/l] | Na<br>[mg/l] | K<br>[mg/l] | Ca<br>[mg/l] | Mg<br>[mg/l] | NO3<br>[mg/l] | SO4<br>[mg/l] | Cl<br>[mg/l] | HCO3<br>[mg/l] | Sr<br>[mg/l] | SiO2<br>[mg/l] | Br<br>[mg/l] | CBE<br>[%] |
|---------|---------------|----------|-----------|---------------|------|-------------|--------------|---------------|---------------|--------------|-------------|--------------|--------------|---------------|---------------|--------------|----------------|--------------|----------------|--------------|------------|
| KK_HP01 | Amer Hillside | 11/14/16 | 28,4      | 3.400         | 6,71 | 120         | 4,25         | 0,025         | 0             | 150          | 14,0        | 345          | 95           | 368           | 156           | 586          | 519            | 1,7          | -              | 0,0          | -3,47      |
| KK_HP16 | Amer Hillside | 11/16/16 | 28        | 2.290         | 6,47 | 76          | 1,97         | 0,6           | 0,5           | 90           | 6,0         | 270          | 64           | 272           | 92            | 327          | 415            | 1,4          | -              | 0,7          | 1,07       |
| KK_HP15 | Amer Hillside | 12/27/16 | 26,5      | 3.600         | 6,72 | 14          | 2,14         | 0,5           | 0,15          | 109          | 15,0        | 350          | 107          | 455           | 145           | 580          | 476            | 3,6          | -              | 1,0          | -4,74      |
| KK_HP04 | Amer Hillside | 12/27/16 | 26,4      | 2.690         | 6,93 | 47          | 2,89         | 3             | 0             | 135          | 22,0        | 210          | 59           | 125           | 116           | 450          | 519            | 2,0          | -              | 0,9          | -8,13      |
| KK_HP10 | Amer Hillside | 12/28/16 | 26,7      | 4.060         | 6,82 | 65          | 2,41         | 0,3           | 2             | 265          | 32,0        | 346          | 125          | 325           | 168           | 715          | 744            | 2,8          | -              | 1,1          | -1,49      |
| KK_BW03 | Amer Hillside | 12/28/16 | 27,9      | 3.410         | 6,51 | 305         | 2,28         | 0             | 0             | 122          | 26,0        | 325          | 93           | 480           | 128           | 486          | 458            | 2,2          | -              | 0,5          | -2,88      |
| KK_HP24 | Amer Hillside | 4/3/17   | 27,6      | 3.980         | 7    | 57          | 27,90        | 3,75          | 0             | 251          | 8,2         | 257          | 137          | 200           | 290           | 740          | 830            | 3,5          | -              | 1,0          | -10,78     |
| KK_HP04 | Amer Hillside | 4/4/17   | 28        | 2.420         | 7,27 | 39          | 2,51         | 0,4           | 0             | 127          | 22,0        | 203          | 55           | 141           | 118           | 446          | 506            | 2,0          | -              | 0,8          | -10,50     |
| KK_HP10 | Amer Hillside | 4/4/17   | 28        | 3.800         | 7,14 | 69          | 2,32         | 0,075         | 4,5           | 219          | 44,0        | 274          | 104          | 337           | 165           | 695          | 793            | 2,9          | -              | 1,1          | -11,55     |
| KK_BW03 | Amer Hillside | 4/4/17   | 29,1      | 3.110         | 6,45 | 222         | 1,68         | 0             | 0             | 73           | 10,0        | 160          | 40           | 460           | 130           | 490          | 513            | 1,0          | -              | 0,8          | -37,49     |
| KK_HP15 | Amer Hillside | 4/5/17   | 28,3      | 3.120         | 6,88 | 43          | 2,32         | 6             | 4,5           | 105          | 15,0        | 306          | 108          | 311           | 152           | 617          | 452            | 3,2          | -              | 1,0          | -6,24      |
| KK_HP01 | Amer Hillside | 4/5/17   | 28,7      | 3.420         | 6,6  | 60          | 2,88         | 0,3           | 0,05          | 136          | 24,0        | 334          | 96           | 425           | 160           | 615          | 537            | 2,5          | -              | 1,0          | -7,76      |
| KK_HP02 | Amer Hillside | 4/5/17   | 28,9      | 2.790         | 6,83 | 73          | 3,07         | 1             | 0,025         | 135          | 15,0        | 281          | 88           | 366           | 120           | 460          | 500            | 2,9          | -              | 0,8          | -3,60      |
| KK_HP16 | Amer Hillside | 4/6/17   | 28,8      | 2.370         | 6,49 | 83          | 2,21         | 0,3           | 0,8           | 88           | 7,5         | 277          | 67           | 300           | 100           | 360          | 458            | 2,0          | -              | 0,6          | -2,54      |
| KK_HP01 | Amer Hillside | 10/11/17 | 29,3      | 2.590         | 7,04 | 91          | 3,89         | -             | -             | 217          | 16,0        | 260          | 70,8         | 328           | 142           | 478          | 513            | 1,5          | 43,7           | 0,8          | -2,52      |
| KK_HP15 | Amer Hillside | 10/12/17 |           | 3.271         | 6,93 | 228         | 2,12         | 1,5           | 0,4           | 187          | 9,5         | 348          | 107,0        | 447           | 159           | 579          | 506            | 2,8          | 38,8           | 1,0          | -0,87      |
| KK_HP10 | Amer Hillside | 10/12/17 | 28,8      | 3.180         | 7,11 | 95          | 2,24         | 0,6           | 3             | 365          | 47,6        | 242          | 98,1         | 240           | 185           | 593          | 787            | 2,1          | 46,6           | 1,0          | -0,14      |

| Well ID  | Sub-group     | Date     | T<br>[°C] | EC<br>[μS/cm] | pH   | ORP<br>[mV] | O2<br>[mg/l] | NO2<br>[mg/l] | NH4<br>[mg/l] | Na<br>[mg/l] | K<br>[mg/l] | Ca<br>[mg/l] | Mg<br>[mg/l] | NO3<br>[mg/l] | SO4<br>[mg/l] | Cl<br>[mg/l] | HCO3<br>[mg/l] | Sr<br>[mg/l] | SiO2<br>[mg/l] | Br<br>[mg/l] | CBE<br>[%] |
|----------|---------------|----------|-----------|---------------|------|-------------|--------------|---------------|---------------|--------------|-------------|--------------|--------------|---------------|---------------|--------------|----------------|--------------|----------------|--------------|------------|
| KK_HP24  | Amer Hillside | 10/12/17 | 28,2      | 3.310         | 7,02 | 114         | 3,27         | 0,3           | 0,025         | 406          | 5,4         | 239          | 126,0        | 244           | 281           | 607          | 781            | 2,5          | 50,3           | 0,9          | 0,48       |
| KK_HP04  | Amer Hillside | 10/13/17 | 28,4      | 2.393         | 7,07 | 99          | 2,84         | -             | -             | 207          | 13,1        | 216          | 59,6         | 149           | 116           | 409          | 513            | 1,6          | 32,3           | 0,7          | 0,54       |
| KK_BW03  | Amer Hillside | 10/13/17 | 28,8      | 2.710         | 6,57 | 270         | 1,65         | 0,025         | 0,025         | 204          | 16,9        | 298          | 83,8         | 440           | 134           | 448          | 513            | 1,8          | 48,8           | 0,7          | 0,24       |
| KK_HP02  | Amer Hillside | 10/14/17 | 30,2      | 2.582         | 7,11 | 96          | 2,48         | 1,5           | 0,05          | 170          | 9,9         | 279          | 82,0         | 306           | 122           | 433          | 488            | 2,1          | 37,1           | 0,7          | 1,12       |
| KK_HP16  | Amer Hillside | 10/14/17 | 29,2      | 1.945         | 6,7  | 60          | 2,13         | 1             | 0,1           | 106          | 4,8         | 224          | 55,5         | 238           | 86,9          | 284          | 397            | 1,2          | 54,2           | 0,5          | 0,79       |
| KK_HP24  | Amer Hillside | 12/20/17 | 25,8      | 3.130         | 6,97 | 130         | 2,44         | 0,4           | 0             | 381          | 8,0         | 216          | 114          | 210           | 250           | 615          | 818            | 2,3          | -              | 1,0          | -3,15      |
| KK_HP16  | Amer Hillside | 12/21/17 | 28,2      | 1.521         | 6,85 | 31          | 2,80         | 0,6           | 0,05          | 105          | 6,5         | 196          | 50           | 273           | 82            | 236          | 323            | 1,1          | -              | 0,4          | 1,53       |
| KK_HP10  | Amer Hillside | 12/21/17 | 26,6      | 2.178         | 6,99 | 31          | 2,88         | 0,6           | 3             | 243          | 31,0        | 156          | 60           | 185           | 136           | 393          | 494            | 1,3          | -              | 0,6          | -1,86      |
| KK_HP01  | Amer Hillside | 12/21/17 | 29,1      | 2.480         | 6,91 | 66          | 2,19         | 0,15          | 0,05          | 194          | 17,0        | 250          | 72           | 349           | 118           | 445          | 482            | 1,6          | -              | 0,8          | -2,26      |
| KK_HP04  | Amer Hillside | 12/21/17 | 26,3      | 2.240         | 7    | 80          | 2,75         | 1,5           | 0,075         | 201          | 18,5        | 227          | 63           | 157           | 116           | 442          | 543            | 1,8          | -              | 0,8          | -1,13      |
| KK_HP15  | Amer Hillside | 12/21/17 | 26,7      | 3.380         | 6,86 | 114         | 2,93         | 1,5           | 0,2           | 200          | 14,5        | 380          | 115          | 555           | 281           | 717          | 513            | 3,1          | -              | 1,0          | -7,33      |
| KK_BW03  | Amer Hillside | 12/21/17 | 28        | 2.550         | 6,75 | 254         | 1,76         | 0             | 0             | 194          | 23,0        | 286          | 78           | 421           | 120           | 433          | 513            | 1,6          | -              | 0,7          | -0,31      |
| KK_HP02  | Amer Hillside | 12/22/17 | 27        | 2.770         | 6,84 | 28,40       | 2,76         | 3             | 0             | 166          | 13,5        | 279          | 78           | 308           | 114           | 445          | 488            | 2,3          | -              | 0,8          | 0,03       |
| NKT_BW01 | Amer Plain    | 11/3/16  | 26,5      | 4.560         | 7,03 | 157         | 3,70         | 0             | 0             | 510          | 2,5         | 93,2         | 104          | 170           | 164           | 935          | 812            | -            | -              | 0,0          | -12,76     |
| NKT_BW01 | Amer Plain    | 11/12/16 | 26,3      | 4.520         | 7,04 | 180         | 3,45         | 0             | 0             | 510          | 3,5         | 91,0         | 108          | 169           | 165           | 944          | 830            | 3,0          | -              | 2,5          | -13,02     |
| NKT_BW06 | Amer Plain    | 12/25/16 | 27,7      | 5.240         | 7,73 | 139         | 2,91         | 0             | 0             | 611          | 1,0         | 101          | 108          | 235           | 175           | 1.020        | 946            | 2,5          | -              | 2,7          | -12,11     |
| NKT_BW09 | Amer Plain    | 12/25/16 | 27,6      | 4.990         | 6,94 | 173         | 2,12         | 0             | 0             | 500          | 2,0         | 118          | 147          | 97            | 214           | 1.034        | 903            | 4,0          | -              | 3,5          | -11,36     |
| NKT_BW15 | Amer Plain    | 12/26/16 | 26,7      | 4.930         | 7,21 | 195         | 3,50         | -             | -             | 575          | 1,0         | 138          | 103          | 214           | 174           | 1.007        | 921            | 2,6          | -              | 2,5          | -11,19     |

| Well ID  | Sub-group  | Date     | T<br>[°C] | EC<br>[μS/cm] | pH   | ORP<br>[mV] | O2<br>[mg/l] | NO2<br>[mg/l] | NH4<br>[mg/l] | Na<br>[mg/l] | K<br>[mg/l] | Ca<br>[mg/l] | Mg<br>[mg/l] | NO3<br>[mg/l] | SO4<br>[mg/l] | Cl<br>[mg/l] | HCO3<br>[mg/l] | Sr<br>[mg/l] | SiO2<br>[mg/l] | Br<br>[mg/l] | CBE<br>[%] |
|----------|------------|----------|-----------|---------------|------|-------------|--------------|---------------|---------------|--------------|-------------|--------------|--------------|---------------|---------------|--------------|----------------|--------------|----------------|--------------|------------|
| KK_HP20  | Amer Plain | 12/27/16 | 27,2      | 3.740         | 7,48 | 105         | 2,73         | 0,15          | 4,5           | 250          | 55,0        | 178          | 102          | 190           | 165           | 670          | 732            | 2,6          | -              | 1,1          | -11,71     |
| PHED03   | Amer Plain | 12/28/16 | 23,5      | 4.830         | 6,82 | 259         | 4,99         | -             | -             | 558          | 2,0         | 343          | 223          | 190           | 255           | 1.360        | 702            | 7,0          | -              | 3,5          | 1,32       |
| KK_BW09  | Amer Plain | 12/30/16 | 26        | 6.060         | 6,74 | 219         | 1,72         | 0             | 0             | 683          | 6,0         | 231          | 178          | 145           | 400           | 1.250        | 873            | 4,9          | -              | 3,1          | -3,60      |
| PHED01   | Amer Plain | 12/30/16 | 27        | 3.530         | 6,82 | 240         | 4,51         | 0             | -             | 230          | 11,0        | 124          | 135          | 77            | 170           | 735          | 574            | 2,7          | -              | 1,4          | -11,73     |
| NKT_BW06 | Amer Plain | 4/2/17   | 29,9      | 5.220         | 8,01 | 207         | 4,26         | -             | -             | 690          | 4,2         | 58,0         | 92           | 255           | 194           | 990          | 879            | 2,4          | -              | 3,1          | -10,86     |
| NKT_BW09 | Amer Plain | 4/2/17   | 29,3      | 3.750         | 6,95 | 240         | 2,49         | 0,025         | 0             | 519          | 5,8         | 96,0         | 114          | 108           | 215           | 1.000        | 879            | 3,6          | -              | 3,7          | -13,92     |
| NKT_BW01 | Amer Plain | 4/3/17   | 29,1      | 4.580         | 7,06 | 177         | 5,20         | -             | -             | 487          | 6,0         | 86,0         | 101          | 174           | 167           | 998          | 818            | 3,5          | -              | 2,9          | -16,99     |
| PHED03   | Amer Plain | 4/3/17   | 29,4      | 3.260         | 7,16 | 245         | 6,07         | -             | -             | 214          | 20,0        | 174          | 90           | 140           | 138           | 735          | 488            | 3,7          | -              | 1,8          | -13,31     |
| PHED01   | Amer Plain | 4/3/17   | 30        | 3.350         | 6,93 | 246         | 5,42         | -             | -             | 217          | 31,0        | 232          | 71           | 80            | 170           | 735          | 555            | 2,5          | -              | 1,5          | -11,25     |
| KK_HP20  | Amer Plain | 4/4/17   | 27,7      | 3.870         | 6,87 | 109         | 2,35         | 0,2           | 4,5           | 295          | 67,0        | 160          | 92           | 258           | 185           | 720          | 787            | 301,0        | -              | 1,3          | -15,59     |
| KK_BW09  | Amer Plain | 4/5/17   | 28,4      | 5.840         | 6,82 | 212         | 3,41         | -             | -             | 668          | 5,3         | 225          | 177          | 167           | 400           | 1.490        | 848            | 5,0          | -              | 3,3          | -9,81      |
| NKT_BW15 | Amer Plain | 10/10/17 | 28,3      | 4.320         | 7,21 | 227         | 2,37         | 0,025         | 0             | 887          | 3,2         | 73,0         | 77,8         | 225           | 181           | 923          | 934            | 2,2          | 24,4           | 2,3          | -0,02      |
| NKT_BW01 | Amer Plain | 10/10/17 | 28,3      | 4.170         | 7,09 | 250         | 4,90         | -             | -             | 773          | 3,2         | 93,5         | 109,0        | 172           | 171           | 1.017        | 818            | 3,3          | 27,1           | 3,2          | -1,13      |
| NKT_BW09 | Amer Plain | 10/10/17 | 28,6      | 4.030         | 7,28 | 217         | 3,37         | 0,025         | 0             | 741          | 3,0         | 91,6         | 109,0        | 106           | 216           | 917          | 866            | 3,3          | 28,1           | 3,5          | -0,46      |
| PHED03   | Amer Plain | 10/14/17 | 28        | 3.310         | 7,31 | 252         | 3,51         | -             | -             | 602          | 2,7         | 79,1         | 108,0        | 111           | 185           | 664          | 885            | 2,4          | 30,2           | 1,3          | 0,28       |
| KK_BW09  | Amer Plain | 10/14/17 | 29,4      | 5.630         | 7,07 | 240         | 4,22         | -             | -             | 930          | 2,1         | 195          | 168,0        | 159           | 362           | 1.412        | 885            | 3,8          | 39,2           | 2,9          | -0,29      |
| PHED01   | Amer Plain | 10/14/17 | 29,6      | 2.980         | 6,99 | 205         | 3,69         | -             | -             | 395          | 15,8        | 202          | 68,1         | 74,8          | 182           | 696          | 531            | 2,2          | 40,0           | 1,4          | -0,09      |
| KK_HP20  | Amer Plain | 10/14/17 | 28,4      | 3.220         | 7,21 | 143         | 2,71         | 0,075         | 4,5           | 434          | 75,8        | 150          | 86,4         | 567           | 193           | 566          | 818            | 2,3          | 59,3           | 1,1          | -9,13      |

| Well ID  | Sub-group   | Date     | T<br>[°C] | EC<br>[μS/cm] | pH   | ORP<br>[mV] | O2<br>[mg/l] | NO2<br>[mg/l] | NH4<br>[mg/l] | Na<br>[mg/l] | K<br>[mg/l] | Ca<br>[mg/l] | Mg<br>[mg/l] | NO3<br>[mg/l] | SO4<br>[mg/l] | Cl<br>[mg/l] | HCO3<br>[mg/l] | Sr<br>[mg/l] | SiO2<br>[mg/l] | Br<br>[mg/l] | CBE<br>[%] |
|----------|-------------|----------|-----------|---------------|------|-------------|--------------|---------------|---------------|--------------|-------------|--------------|--------------|---------------|---------------|--------------|----------------|--------------|----------------|--------------|------------|
| NKT_BW09 | Amer Plain  | 12/20/17 | 28,7      | 4.040         | 7,05 | 160         | 3,24         | -             | -             | 729          | 6,5         | 84,0         | 105          | 114           | 197           | 916          | 891            | 2,9          | -              | 3,0          | -1,83      |
| KK_HP20  | Amer Plain  | 12/21/17 | 27,7      | 3.170         | 7,09 | 196         | 2,59         | 0,1           | 8             | 436          | 66,0        | 150          | 87           | 246           | 161           | 554          | 903            | 2,3          | -              | 0,8          | -3,35      |
| NKT_BW06 | Amer Plain  | 12/22/17 | 28        | 4.740         | 7,34 | 187,20      | 3,46         | -             | -             | 947          | 5,5         | 56,0         | 95           | 250           | 197           | 984          | 793            | 2,3          | -              | 3,0          | 3,03       |
| PHED01   | Amer Plain  | 12/22/17 | 28,9      | 2.840         | 6,89 | 197,70      | 4,85         | -             | -             | 394          | 24,5        | 192          | 66           | 68            | 178           | 776          | 464            | 2,2          | -              | 1,4          | -2,26      |
| NKT_BW15 | Amer Plain  | 12/22/17 | 27,7      | 4.270         | 7,24 | 202,80      | 2,95         | 0,05          | 0             | 891          | 8,0         | 88,0         | 97           | 221           | 175           | 978          | 842            | 2,2          | -              | 2,3          | 2,74       |
| KK_HP03  | Amer Valley | 12/27/16 | 26,8      | 1.681         | 7    | 82          | 4,22         | -             | -             | 90           | 37,0        | 113          | 35           | 95            | 66            | 203          | 439            | 0,7          | -              | 0,4          | -8,39      |
| KK_HP19  | Amer Valley | 12/27/16 | 27,6      | 1.951         | 7    | 105         |              | -             | -             | 106          | 34,0        | 136          | 43           | 81            | 94            | 278          | 445            | 0,8          | -              | 0,6          | -7,60      |
| KK_DW03  | Amer Valley | 12/27/16 | 26,7      | 987           | 7,17 | 254         | 6,07         | -             | -             | 70           | 29,0        | 67,0         | 24           | 52            | 37            | 95           | 342            | 0,5          | -              | 0,2          | -4,13      |
| KK_HP23  | Amer Valley | 12/28/16 | 26,1      | 1.893         | 6,91 | 101         | 3,73         | 0,15          | 0             | 98           | 33,0        | 140          | 41           | 100           | 76            | 245          | 458            | 0,9          | -              | 0,5          | -6,47      |
| KK_BW02  | Amer Valley | 12/28/16 | 25,3      | 1.743         | 6,91 | 250         | 4,45         | -             | -             | 98           | 33,0        | 120          | 37           | 108           | 70            | 212          | 433            | 0,8          | -              | 0,5          | -7,03      |
| KK_HP03  | Amer Valley | 4/4/17   | 27,3      | 1.263         | 7    | 60          | 3,85         | -             | -             | 102          | 30,0        | 86,0         | 27           | 71            | 55            | 145          | 391            | 0,5          | -              | 0,3          | -4,34      |
| KK_HP23  | Amer Valley | 4/4/17   | 27,8      | 1.970         | 6,86 | 66          | 4,35         | -             | -             | 147          | 2,6         | 155          | 48           | 170           | 128           | 354          | 445            | 1,0          | -              | 0,6          | -11,13     |
| KK_BW02  | Amer Valley | 4/4/17   | 28,3      | 1.332         | 6,97 | 218         | 5,23         | -             | -             | 106          | 27,5        | 92,0         | 28           | 83            | 56            | 164          | 366            | 0,7          | -              | 0,4          | -3,64      |
| KK_HP19  | Amer Valley | 10/11/17 | 28,7      | 787           | 7,8  | 129         | 4,38         | -             | -             | 105          | 14,3        | 35,5         | 11,6         | 23,6          | 34,0          | 83,4         | 281            | 0,2          | 27,2           | 0,2          | -2,43      |
| KK_HP03  | Amer Valley | 10/11/17 | 27,3      | 1.217         | 7,08 | 58          | 4,62         | -             | -             | 131          | 23,8        | 78,4         | 24,0         | 60,4          | 44,4          | 142          | 403            | 0,5          | 32,7           | 0,3          | -1,25      |
| KK_BW02  | Amer Valley | 10/13/17 | 27,9      | 1.259         | 6,84 | 270         | 3,89         | -             | -             | 130          | 22,0        | 89,1         | 26,2         | 77,7          | 49,8          | 149          | 372            | 0,5          | 32,9           | 0,3          | 0,89       |
| KK_HP23  | Amer Valley | 10/13/17 | 27,7      | 1.519         | 7,03 | 53          | 4,45         | 0,2           | 0,025         | 147          | 25,7        | 111          | 32,6         | 93,9          | 69,7          | 204          | 397            | 0,6          | 33,7           | 0,4          | 0,18       |
| KK_HP03  | Amer Valley | 12/21/17 | 27,2      | 1.127         | 7,07 | 221         | 3,85         | -             | -             | 123          | 28,0        | 71,0         | 23           | 61            | 45            | 120          | 372            | 0,4          | -              | 0,3          | 0,42       |

| Well ID   | Sub-group          | Date     | T<br>[°C] | EC<br>[μS/cm] | pH   | ORP<br>[mV] | O2<br>[mg/l] | NO2<br>[mg/l] | NH4<br>[mg/l] | Na<br>[mg/l] | K<br>[mg/l] | Ca<br>[mg/l] | Mg<br>[mg/l] | NO3<br>[mg/l] | SO4<br>[mg/l] | Cl<br>[mg/l] | HCO3<br>[mg/l] | Sr<br>[mg/l] | SiO2<br>[mg/l] | Br<br>[mg/l] | CBE<br>[%] |
|-----------|--------------------|----------|-----------|---------------|------|-------------|--------------|---------------|---------------|--------------|-------------|--------------|--------------|---------------|---------------|--------------|----------------|--------------|----------------|--------------|------------|
| KK_BW02   | Amer Valley        | 12/21/17 | 27,2      | 963           | 7,22 | 266         | 4,85         | -             | -             | 106          | 21,5        | 62,0         | 19           | 52            | 42            | 105          | 299            | 0,4          | -              | 0,0          | 1,42       |
| KK_HP19   | Amer Valley        | 12/21/17 | 28,3      | 760           | 7,55 |             | 4,40         | -             | -             | 107          | 18,0        | 33,0         | 11           | 26            | 36            | 90           | 250            | 0,2          | --             | 0,2          | -0,70      |
| KK_HP23   | Amer Valley        | 12/22/17 | 27,2      | 1.393         | 7,04 | 100,90      | 5,07         | 0,4           | 0             | 144          | 30,0        | 93,0         | 30           | 86            | 66            | 167          | 372            | 0,5          | -              | 0,4          | 2,05       |
| KK_LAKE02 | Historic Reservoir | 10/12/17 | 25,3      | 1.457         | 7,74 | 224         | 1,77         | 0,025         | 0,8           | 143          | 40,0        | 58,0         | 66,0         | 0,0           | 160           | 190          | 391            | 10,5         | -              | 0,4          | 1,56       |
| NKT_BW42  | NKT East           | 12/26/16 | 27,8      | 3.950         | 6,91 | 220         | 4,90         | -             | -             | 235          | 9,0         | 206          | 131          | 86            | 93            | 1.000        | 421            | 5,1          | -              | 3,3          | -9,89      |
| NKT_BW25  | NKT East           | 12/26/16 | 28        | 3.900         | 7,18 | 276         | 5,76         | -             | -             | 324          | 8,0         | 194          | 123          | 87            | 124           | 945          | 574            | 4,2          | -              | 3,2          | -8,01      |
| NKT_BW42  | NKT East           | 4/3/17   | 28,8      | 3.930         | 7,69 | 252         | 5,50         | -             | -             | 235          | 7,1         | 207          | 132          | 88            | 101           | 1.000        | 427            | 5,5          | -              | 3,5          | -10,14     |
| NKT_BW25  | NKT East           | 4/3/17   | 29,1      | 4.030         | 7,64 | 263         | 6,64         | -             | -             | 332          | 7,1         | 157          | 93           | 88            | 132           | 936          | 574            | 3,9          | -              | 3,5          | -14,07     |
| NKT_BW25  | NKT East           | 10/10/17 | 29,3      | 3.500         | 6,96 | 276         | 3,89         | -             | -             | 526          | 4,1         | 156,0        | 92,5         | 86,6          | 135           | 898          | 567            | 3,5          | 28,0           | 3,4          | -0,59      |
| NKT_BW42  | NKT East           | 10/10/17 | 29,7      | 3.300         | 7,01 | 215         | 5,19         | -             | -             | 373          | 4,3         | 193,0        | 123,0        | 90,0          | 96,9          | 937          | 421            | 4,6          | 29,3           | 3,4          | -0,98      |
| NKT_BW42  | NKT East           | 12/23/17 | 28,5      | 3.280         | 6,94 | 199,30      | 7,37         | -             | -             | 358          | 8,0         | 192          | 123          | 94            | 100           | 977          | 409            | 4,8          | -              | 3,4          | -3,24      |
| NKT_BW41  | NKT North          | 12/26/16 | 27,1      | 5.100         | 6,81 | 242         | 4,42         | -             | -             | 570          | 1,0         | 234          | 205          | 201           | 209           | 1.380        | 781            | 6,0          | -              | 4,1          | -5,28      |
| NKT_BW41  | NKT North          | 4/2/17   | 29,1      | 5.250         | 7,2  | 255         | 4,84         | -             | -             | 580          | 8,7         | 185          | 160          | 213           | 215           | 1.353        | 671            | 6,0          | -              | 4,3          | -8,79      |
| NKT_BW41  | NKT North          | 10/12/17 | 29,4      | 5.680         | 6,87 | 171         | 5,11         | -             | -             | 899          | 4,9         | 206          | 179,0        | 214           | 234           | 1.612        | 653            | 5,9          | 29,1           | 4,9          | -0,20      |
| NKT_BW41  | NKT North          | 12/24/17 | 27,6      | 5.850         | 6,75 | 209,10      | 4,70         | -             | -             | 866          | 8,7         | 204          | 175          | 210           | 220           | 1.550        | 525            | -            | -              | 4,6          | 1,78       |
| NKT_HP01  | NKT West           | 12/25/16 | 26,5      | 6.200         | 7,42 | 40          | 2,44         | 5             | 0,05          | 611          | 3,0         | 188          | 196          | 100           | 255           | 1.350        | 866            | 5,0          | -              | 5,0          | -6,32      |
| NKT_BW49  | NKT West           | 12/25/16 | 28,3      | 5.700         | 7,55 | 52          | 2,53         | 0,1           | 0             | 611          | 5,0         | 120          | 162          | 173           | 185           | 1.150        | 848            | 3,7          | -              | 3,7          | -7,03      |
| NKT_BW13  | NKT West           | 12/25/16 | 26,7      | 5.950         | 7,46 | 207         | 4,92         | -             | -             | 710          | 1,0         | 86,0         | 127          | 153           | 265           | 1.050        | 1.025          | 2,9          | -              | 3,6          | -8,75      |

| Well ID  | Sub-group | Date     | T<br>[°C] | EC<br>[μS/cm] | pH   | ORP<br>[mV] | O2<br>[mg/l] | NO2<br>[mg/l] | NH4<br>[mg/l] | Na<br>[mg/l] | K<br>[mg/l] | Ca<br>[mg/l] | Mg<br>[mg/l] | NO3<br>[mg/l] | SO4<br>[mg/l] | Cl<br>[mg/l] | HCO3<br>[mg/l] | Sr<br>[mg/l] | SiO2<br>[mg/l] | Br<br>[mg/l] | CBE<br>[%] |
|----------|-----------|----------|-----------|---------------|------|-------------|--------------|---------------|---------------|--------------|-------------|--------------|--------------|---------------|---------------|--------------|----------------|--------------|----------------|--------------|------------|
| NKT_BW47 | NKT West  | 12/25/16 | 26,5      | 5.500         | 7,35 | 248         | 4,67         | 0             | 0             | 743          | 1,0         | 40,5         | 81           | 150           | 205           | 1.000        | 1.263          | 1,9          | -              | 3,0          | -15,12     |
| NKT_HP04 | NKT West  | 12/26/16 | 26,8      | 4.130         | 7,02 | 5           | 3,05         | 0,3           | 0,025         | 410          | 7,0         | 117          | 111          | 159           | 141           | 890          | 775            | 3,6          | -              | 2,2          | -13,52     |
| NKT_BW03 | NKT West  | 12/26/16 | 25,6      | 5.520         | 7,18 | 218         | 3,53         | 0             | 0             | 720          | 8,0         | 80,0         | 98           | 179           | 205           | 963          | 1.037          | 2,5          | -              | 3,2          | -8,15      |
| NKT_HP01 | NKT West  | 4/2/17   | 28,7      | 5.850         | 7,56 | 119         | 2,76         | 1             | 0,05          | 645          | 9,0         | 148          | 150          | 114           | 266           | 1.307        | 833            | 4,5          | -              | 5,1          | -9,33      |
| NKT_HP04 | NKT West  | 4/2/17   | 29,7      | 4.190         | 7,33 | 129         | 3,08         | 0,2           | 0             | 454          | 6,1         | 105          | 98           | 164           | 152           | 884          | 732            | 3,6          | -              | 2,4          | -12,56     |
| NKT_BW47 | NKT West  | 4/2/17   | 28,8      | 5.180         | 7,69 | 249         | 4,23         | -             | -             | 763          | 3,5         | 31,0         | 63           | 165           | 212           | 960          | 1.141          | 1,7          | -              | 3,0          | -13,83     |
| NKT_BW03 | NKT West  | 4/3/17   | 27,9      | 5.450         | 7,71 | 239         | 1,73         | 0             | 0,025         | 711          | 4,0         | 64,0         | 78           | 205           | 216           | 1.011        | 988            | 2,5          | -              | 3,2          | -12,75     |
| NKT_BW49 | NKT West  | 4/3/17   | 29        | 5.440         | 7,12 | 255         | 4,74         | -             | -             | 596          | 7,1         | 101          | 125          | 193           | 197           | 1.260        | 787            | 3,6          | -              | 3,9          | -14,65     |
| NKT_BW03 | NKT West  | 10/9/17  | 29,7      | 4.730         | 7,65 | 306         | 2,97         | 0             | 0             | 1.008        | 2,9         | 19,0         | 73,1         | 200           | 224           | 1.027        | 1.025          | 2,0          | 23,6           | 3,0          | -2,65      |
| NKT_BW13 | NKT West  | 10/9/17  | 28,6      | 4.750         | 7,64 | 316         | 6,04         | -             | -             | 953          | 3,7         | 83,2         | 91,5         | 164           | 232           | 1.076        | 1.025          | 2,4          | 25,0           | 3,6          | -1,29      |
| NKT_BW49 | NKT West  | 10/9/17  | 29,4      | 5.020         | 7,53 | 287         | 3,18         | -             | -             | 877          | 3,0         | 103          | 138,0        | 204           | 191           | 1.244        | 812            | 3,5          | 26,2           | 3,9          | -0,85      |
| NKT_HP01 | NKT West  | 10/9/17  | 27,9      | 5.010         | 7,43 | 118         | 2,75         | -             | -             | 839          | 3,8         | 143          | 151,0        | 110           | 240           | 1.273        | 805            | 3,9          | 27,6           | 4,5          | 0,25       |
| NKT_HP04 | NKT West  | 10/9/17  | 27,4      | 4.040         | 7,54 | 151         | 3,36         | -             | -             | 699          | 3,3         | 110          | 101,0        | 168           | 158           | 924          | 738            | 3,3          | 28,2           | 2,5          | 0,14       |
| NKT_BW47 | NKT West  | 10/10/17 | 28,4      | 4.570         | 7,48 | 185         | 4,10         | -             | -             | 1.046        | 1,7         | 34,1         | 64,9         | 164           | 220           | 924          | 1.178          | 1,6          | 23,2           | 2,8          | 0,00       |
| NKT_HP04 | NKT West  | 12/20/17 | 27,5      | 4.040         | 7,11 | 70          | 3,83         | -             | -             | 677          | 7,0         | 102          | 98           | 165           | 150           | 970          | 726            | 3,1          | -              | 2,0          | -2,58      |
| NKT_BW47 | NKT West  | 12/20/17 | 27,3      | 4.560         | 7,41 | 189         | 4,22         | -             | -             | 1.004        | 4,5         | 34,0         | 63           | 195           | 210           | 950          | 1.153          | 1,4          | -              | 3,0          | -2,45      |
| NKT_HP01 | NKT West  | 12/22/17 | 27,4      | 5.290         | 7    | 136,70      | 3,43         | 0,75          | 0,025         | 872          | 10,0        | 141          | 153          | 129           | 251           | 1.200        | 763            | 4,1          | -              | 4,9          | 3,73       |
| NKT_BW03 | NKT West  | 12/22/17 | 26,8      | 4.590         | 7,21 | 236,70      | 2,75         | -             | -             | 978          | 7,0         | 56,0         | 73           | 197           | 213           | 910          | 940            | 1,9          | -              | 2,8          | 2,84       |

| Well ID   | Sub-group                   | Date     | T<br>[°C] | EC<br>[μS/cm] | pH    | ORP<br>[mV] | O2<br>[mg/l] | NO2<br>[mg/l] | NH4<br>[mg/l] | Na<br>[mg/l] | K<br>[mg/l] | Ca<br>[mg/l] | Mg<br>[mg/l] | NO3<br>[mg/l] | SO4<br>[mg/l] | Cl<br>[mg/l] | HCO3<br>[mg/l] | Sr<br>[mg/l] | SiO2<br>[mg/l] | Br<br>[mg/l] | CBE<br>[%] |
|-----------|-----------------------------|----------|-----------|---------------|-------|-------------|--------------|---------------|---------------|--------------|-------------|--------------|--------------|---------------|---------------|--------------|----------------|--------------|----------------|--------------|------------|
| NKT_BW49  | NKT West                    | 12/23/17 | 28,1      | 5.070         | 6,99  | 199,80      | 2,62         | 0             | 0             | 966          | 7,0         | 98,0         | 144          | 216           | 180           | 1.163        | 641            | 3,5          | -              | 3,8          | 7,68       |
| NKT_HP12  | Outlier<br>(Amer<br>Inflow) | 10/14/17 | 29,8      | 576           | 7,82  | 217         | 3,23         | -             | -             | 50           | 2,1         | 44,2         | 21,9         | 20,4          | 15,1          | 21           | 329            | 0,6          | 22,8           | 0,1          | -3,03      |
| NKT_HP12  | Outlier<br>(Amer<br>Inflow) | 12/23/17 | 27,6      | 575           | 7,44  | 160,30      | 4,04         | -             | -             | 54           | 2,6         | 43,0         | 21           | 17            | 14            | 22           | 305            | 0,6          | -              | 0,0          | 0,83       |
| KK_BW08   | Outlier<br>(Amer<br>Plain)  | 12/30/16 | 26,1      | 7.630         | 6,59  | 159         | 2,29         | 0,05          | 0             | 713          | 44,0        | 374          | 165          | 270           | 530           | 1.600        | 653            | 0,0          | -              | 4,4          | -5,04      |
| KK_BW08   | Outlier<br>(Amer<br>Plain)  | 4/3/17   | 29,7      | 7.470         | 6,99  | 216         | 2,34         | 0,025         | 0             | 688          | 52,0        | 425          | 183          | 274           | 559           | 1.860        | 641            | 5,0          | -              | 4,8          | -7,85      |
| KK_BW08   | Outlier<br>(Amer<br>Plain)  | 10/13/17 | 29,3      | 7.450         | 6,57  | 168         | 2,21         | 0,05          | 0,05          | 1.029        | 45,1        | 452          | 193,0        | 229           | 564           | 2.133        | 653            | 4,5          | 40,1           | 5,0          | -1,14      |
| KK_BW08   | Outlier<br>(Amer<br>Plain)  | 12/22/17 | 28,2      | 7.680         | 6,63  | 201,80      | 2,96         | -             | -             | 1.050        | 51,0        | 443          | 192          | 222           | 543           | 1.964        | 592            | 4,4          | -              | 4,7          | 2,97       |
| KK_OBS02  | Outlier<br>(Amer Pz.)       | 12/28/16 | 29        | 1.909         | 8,57  | -192        | 0,16         | 0             | 3             | 210          | 5,0         | 16,0         | 44           | 0             | 1             | 536          | 122            | 0,1          | -              | 0,7          | -11,22     |
| KK_OBS02  | Outlier<br>(Amer Pz.)       | 4/7/17   | 30,5      | 1.849         | 8,46  | -190        | 0,20         | 0             | 2             | 171          | 20,0        | 121          | 38,0         | 0,2           | 0,5           | 541          | 146            | 0,5          | -              | 1,0          | -1,61      |
| NKT_DW02  | Outlier (NKT<br>Dug well)   | 11/12/16 | 26,8      | 4.650         | 7,1   | 267         | 7,14         | 0,025         | 0             | 485          | 4,0         | 169          | 119          | 140           | 165           | 1.000        | 751            | 3,7          | -              | 2,5          | -7,91      |
| NKT_DW02  | Outlier (NKT<br>Dug well)   | 4/3/17   | 28,1      | 4.510         | 7,43  | 255         | 6,69         | -             | -             | 427          | 6,4         | 122          | 105          | 144           | 162           | 960          | 732            | 4,0          | -              | 2,7          | -14,45     |
| Rain      | Rain                        | 1/26/17  | 16,9      | 53            | 6,23  | 293         | 8,99         | -             | -             | 0,5          | 0,0         | 2,7          | 0            | 5             | 11            | 2            | 12             | 0,0          | -              | 0,0          | -50,40     |
| KK_LAKE01 | Taalaab                     | 11/14/16 | 23,8      | 1.321         | 9,54  | 182         | 12,73        | 0             | -             | 120          | 30,0        | 40,0         | 34           | 2             | 43            | 250          | 238            | 0,5          | -              | 0,0          | -4,86      |
| KK_LAKE01 | Taalaab                     | 10/14/17 | 27,2      | 843           | 11,04 | 44          | 20,62        | 0             | 0,05          | 112          | 22,0        | 30,0         | 6,7          | 1,1           | 23,0          | 140          | 159            | 0,3          | -              | 0,1          | 3,01       |



**Table S3** Results from stable isotopes analysis of water samples used for interpretation.

| Well ID  | Sub-group     | Date     | $\delta^{18}\text{O}_{\text{VSMOW}}$<br>[‰] | sd $\delta^{18}\text{O}$<br>[‰] | $\delta^2\text{H}_{\text{VSMOW}}$<br>[‰] | sd $\delta^2\text{H}$<br>[‰] | DE    | T<br>[°C] | T <sub>air</sub><br>[°C] | Altitude<br>[masl] |
|----------|---------------|----------|---------------------------------------------|---------------------------------|------------------------------------------|------------------------------|-------|-----------|--------------------------|--------------------|
| KK_HP04  | Amer Hillside | 8/24/17  | -3.39                                       | 0.07                            | -26.88                                   | 0.06                         | 0.22  | 28.3      | 28.9                     | 465                |
| KK_HP01  | Amer Hillside | 8/24/17  | -4.18                                       | 0.04                            | -30.58                                   | 0.14                         | 2.85  | 30.1      | 29.3                     | 414                |
| KK_HP10  | Amer Hillside | 8/24/17  | -3.05                                       | 0.11                            | -25.76                                   | 0.30                         | -1.35 | 28.6      | 30.7                     | 409                |
| KK_HP01  | Amer Hillside | 8/31/17  | -3.28                                       | 0.15                            | -25.74                                   | 0.55                         | 0.50  | 28.8      | 27.3                     | 414                |
| KK_HP04  | Amer Hillside | 8/31/17  | -3.40                                       | 0.08                            | -27.00                                   | 0.21                         | 0.21  | 27.6      | 26.4                     | 465                |
| KK_HP10  | Amer Hillside | 8/31/17  | -3.25                                       | 0.05                            | -25.62                                   | 0.28                         | 0.37  | 27.4      | 26.4                     | 409                |
| KK_HP01  | Amer Hillside | 9/7/17   | -3.41                                       | 0.05                            | -27.71                                   | 0.13                         | -0.46 | 29.2      | 27.8                     | 414                |
| KK_HP04  | Amer Hillside | 9/7/17   | -3.48                                       | 0.11                            | -27.79                                   | 0.54                         | 0.03  | 28.4      | 28.6                     | 465                |
| KK_HP10  | Amer Hillside | 9/7/17   | -3.13                                       | 0.06                            | -26.21                                   | 0.47                         | -1.19 | 28.3      | 28.5                     | 409                |
| KK_HP01  | Amer Hillside | 9/14/17  | -3.36                                       | 0.13                            | -27.09                                   | 0.73                         | -0.24 | 28.6      | 26.6                     | 414                |
| KK_HP04  | Amer Hillside | 9/15/17  | -3.22                                       | 0.05                            | -27.03                                   | 0.33                         | -1.26 | 31.1      | 38.7                     | 465                |
| KK_HP10  | Amer Hillside | 9/15/17  | -3.14                                       | 0.02                            | -26.26                                   | 0.12                         | -1.17 | 29.9      | 36.5                     | 409                |
| KK_HP01  | Amer Hillside | 9/22/17  | -3.33                                       | 0.16                            | -27.47                                   | 0.76                         | -0.82 | 28.8      | 28.5                     | 414                |
| KK_HP04  | Amer Hillside | 9/22/17  | -3.33                                       | 0.04                            | -27.27                                   | 0.12                         | -0.66 | 29.8      | 30                       | 465                |
| KK_HP10  | Amer Hillside | 9/22/17  | -3.10                                       | 0.14                            | -25.80                                   | 0.66                         | -0.99 | 29.6      | 31.7                     | 409                |
| KK_HP01  | Amer Hillside | 9/29/17  | -3.31                                       | 0.11                            | -27.57                                   | 0.55                         | -1.06 | 28.9      | 29.1                     | 414                |
| KK_HP04  | Amer Hillside | 9/29/17  | -3.22                                       | 0.09                            | -27.39                                   | 0.17                         | -1.62 | 27.9      | 29.6                     | 465                |
| KK_HP10  | Amer Hillside | 9/29/17  | -3.12                                       | 0.15                            | -25.80                                   | 0.62                         | -0.84 | 28.4      | 29.4                     | 409                |
| KK_HP01  | Amer Hillside | 10/11/17 | -3.44                                       | 0.15                            | -27.90                                   | 0.67                         | -0.38 | 29.3      | 29.5                     | 414                |
| KK_HP15  | Amer Hillside | 10/12/17 | -4.25                                       | 0.07                            | -32.16                                   | 0.73                         | 1.88  | -         | 28.9                     | 412                |
| KK_HP10  | Amer Hillside | 10/12/17 | -3.10                                       | 0.08                            | -25.16                                   | 0.59                         | -0.34 | 28.8      | 29.6                     | 409                |
| KK_BW03  | Amer Hillside | 10/13/17 | -4.07                                       | 0.07                            | -29.55                                   | 0.32                         | 3.03  | 28.8      | 27.3                     | 419                |
| KK_HP04  | Amer Hillside | 10/13/17 | -3.40                                       | 0.07                            | -27.87                                   | 0.67                         | -0.68 | 28.4      | 28.8                     | 465                |
| KK_HP16  | Amer Hillside | 10/14/17 | -4.80                                       | 0.08                            | -33.91                                   | 0.57                         | 4.46  | 29.2      | 28.9                     | 423                |
| KK_HP02  | Amer Hillside | 10/14/17 | -4.75                                       | 0.04                            | -33.12                                   | 0.62                         | 4.85  | 30.2      | 25.5                     | 405                |
| KK_HP01  | Amer Hillside | 11/1/17  | -4.21                                       | 0.12                            | -29.87                                   | 0.36                         | 3.77  | 29.2      | 31                       | 414                |
| KK_HP10  | Amer Hillside | 11/1/17  | -3.30                                       | 0.06                            | -25.96                                   | 0.71                         | 0.47  | 28.2      | 30.3                     | 409                |
| KK_HP04  | Amer Hillside | 11/1/17  | -3.55                                       | 0.07                            | -27.65                                   | 0.22                         | 0.72  | 27.8      | 29.3                     | 465                |
| KK_HP01  | Amer Hillside | 11/11/17 | -3.96                                       | 0.17                            | -29.98                                   | 0.76                         | 1.72  | 28.7      | 27.1                     | 414                |
| KK_HP04  | Amer Hillside | 11/11/17 | -3.34                                       | 0.14                            | -27.57                                   | 0.43                         | -0.88 | 28.1      | 28.2                     | 465                |
| KK_HP10  | Amer Hillside | 11/11/17 | -3.27                                       | 0.07                            | -27.17                                   | 0.22                         | -1.02 | 27.7      | 27.3                     | 409                |
| KK_HP01  | Amer Hillside | 11/16/17 | -4.04                                       | 0.10                            | -29.66                                   | 0.84                         | 2.69  | -         | 26.8                     | 414                |
| KK_HP04  | Amer Hillside | 11/16/17 | -3.57                                       | 0.13                            | -27.76                                   | 0.71                         | 0.84  | 28.4      | 30.4                     | 465                |
| KK_HP10  | Amer Hillside | 11/16/17 | -3.39                                       | 0.06                            | -27.18                                   | 0.31                         | -0.04 | 27.4      | 27                       | 409                |
| KK_HP01  | Amer Hillside | 12/1/17  | -3.98                                       | 0.02                            | -29.83                                   | 0.19                         | 2.04  | 27        | 18.3                     | 414                |
| KK_HP04  | Amer Hillside | 12/1/17  | -3.47                                       | 0.02                            | -27.42                                   | 0.21                         | 0.35  | 28.5      | 30.2                     | 465                |
| KK_HP10  | Amer Hillside | 12/1/17  | -3.39                                       | 0.07                            | -26.97                                   | 0.32                         | 0.17  | 27.5      | 26.3                     | 409                |
| KK_HP01  | Amer Hillside | 12/7/17  | -4.09                                       | 0.03                            | -30.12                                   | 0.32                         | 2.63  | 27.5      | 21.6                     | 414                |
| KK_HP04  | Amer Hillside | 12/7/17  | -3.48                                       | 0.03                            | -27.55                                   | 0.32                         | 0.26  | 27.1      | 18.9                     | 465                |
| KK_HP10  | Amer Hillside | 12/7/17  | -3.34                                       | 0.02                            | -27.68                                   | 0.12                         | -0.97 | 26.4      | 20.1                     | 409                |
| KK_HP24  | Amer Hillside | 12/20/17 | -3.19                                       | 0.02                            | -25.37                                   | 0.05                         | 0.14  | 25.8      | 18.7                     | 385                |
| KK_BW03  | Amer Hillside | 12/21/17 | -3.66                                       | 0.01                            | -28.49                                   | 0.23                         | 0.75  | 28        | 24.4                     | 419                |
| KK_HP02  | Amer Hillside | 12/22/17 | -4.37                                       | 0.04                            | -31.54                                   | 0.28                         | 3.40  | 27        | 21.4                     | 405                |
| KK_HP24  | Amer Hillside | 10/12/17 | -3.60                                       | 0.07                            | -26.95                                   | 0.15                         | 1.88  | 28        | -                        | 385                |
| KK_HP01  | Amer Hillside | 11/14/16 | -3.28                                       | 0.04                            | -27.21                                   | 0.22                         | -0.99 | 28.4      | -                        | 414                |
| KK_HP16  | Amer Hillside | 11/14/16 | -4.94                                       | 0.08                            | -35.10                                   | 0.14                         | 4.38  | 28.8      | -                        | 423                |
| KK_HP10  | Amer Hillside | 10/10/18 | -2.45                                       | 0.07                            | -21.90                                   | 0.47                         | -2.29 | 28.3      | 30.1                     | 409                |
| NKT_BW42 | NKT East      | 10/10/17 | -4.58                                       | 0.11                            | -33.72                                   | 0.74                         | 2.95  | 29.7      | 28.6                     | 384                |
| NKT_BW25 | NKT East      | 10/10/17 | -4.41                                       | 0.08                            | -33.79                                   | 0.59                         | 1.52  | 29.3      | 28.4                     | 381                |
| NKT_BW42 | NKT East      | 11/8/16  | -4.52                                       | 0.05                            | -33.36                                   | 0.28                         | 2.83  | 28.7      | -                        | 384                |
| NKT_BW25 | NKT East      | 11/8/16  | -4.63                                       | 0.06                            | -33.95                                   | 0.20                         | 3.07  | 27.2      | -                        | 381                |
| KK_HP03  | Amer Valley   | 8/24/17  | -3.56                                       | 0.12                            | -29.04                                   | 0.48                         | -0.57 | 27.8      | 27.6                     | 415                |
| KK_HP19  | Amer Valley   | 8/24/17  | -3.49                                       | 0.17                            | -29.51                                   | 0.40                         | -1.60 | 29.2      | 27.6                     | 394                |
| KK_HP03  | Amer Valley   | 8/31/17  | -3.60                                       | 0.10                            | -28.84                                   | 0.22                         | -0.05 | 27.5      | 27.4                     | 415                |
| KK_HP19  | Amer Valley   | 8/31/17  | -3.45                                       | 0.09                            | -28.73                                   | 0.10                         | -1.12 | 28.3      | 26.6                     | 394                |

| Well ID   | Sub-group          | Date     | $\delta^{18}\text{O}_{\text{VSMOW}}$<br>[‰] | sd $\delta^{18}\text{O}$<br>[‰] | $\delta^2\text{H}_{\text{VSMOW}}$<br>[‰] | sd $\delta^2\text{H}$<br>[‰] | DE     | T<br>[°C] | T <sub>air</sub><br>[°C] | Altitude<br>[masl] |
|-----------|--------------------|----------|---------------------------------------------|---------------------------------|------------------------------------------|------------------------------|--------|-----------|--------------------------|--------------------|
| KK_HP03   | Amer Valley        | 9/7/17   | -3.54                                       | 0.04                            | -28.27                                   | 0.29                         | 0.03   | 27.9      | 27.5                     | 415                |
| KK_HP19   | Amer Valley        | 9/7/17   | -3.36                                       | 0.02                            | -29.75                                   | 0.14                         | -2.87  | 28.3      | 27.6                     | 394                |
| KK_HP03   | Amer Valley        | 9/14/17  | -3.64                                       | 0.10                            | -28.88                                   | 0.25                         | 0.25   | 27.4      | 26.5                     | 415                |
| KK_HP19   | Amer Valley        | 9/14/17  | -3.18                                       | 0.20                            | -29.08                                   | 0.64                         | -3.65  | 28.2      | 26.5                     | 394                |
| KK_HP03   | Amer Valley        | 9/22/17  | -3.57                                       | 0.05                            | -29.17                                   | 0.10                         | -0.58  | 27.9      | 27.2                     | 415                |
| KK_HP19   | Amer Valley        | 9/22/17  | -3.21                                       | 0.13                            | -28.87                                   | 0.65                         | -3.17  | 28.8      | 27.7                     | 394                |
| KK_HP03   | Amer Valley        | 9/29/17  | -3.51                                       | 0.04                            | -29.08                                   | 0.17                         | -0.99  | 27.5      | 28                       | 415                |
| KK_HP19   | Amer Valley        | 9/29/17  | -3.19                                       | 0.17                            | -28.33                                   | 0.64                         | -2.83  | 28.9      | 28.8                     | 394                |
| KK_HP03   | Amer Valley        | 10/11/17 | -3.37                                       | 0.02                            | -28.95                                   | 0.08                         | -2.00  | 27.3      | 30.6                     | 415                |
| KK_HP19   | Amer Valley        | 10/11/17 | -3.35                                       | 0.18                            | -29.30                                   | 0.74                         | -2.47  | 28.7      | 27.7                     | 394                |
| KK_BW02   | Amer Valley        | 10/13/17 | -3.25                                       | 0.06                            | -28.33                                   | 0.29                         | -2.30  | 27.9      | 26.3                     | 394                |
| KK_HP19   | Amer Valley        | 11/1/17  | -3.51                                       | 0.02                            | -29.75                                   | 0.36                         | -1.71  | 28        | 28.5                     | 394                |
| KK_HP03   | Amer Valley        | 11/1/17  | -3.70                                       | 0.09                            | -28.95                                   | 0.64                         | 0.61   | 27.4      | 27.6                     | 415                |
| KK_HP03   | Amer Valley        | 11/11/17 | -3.35                                       | 0.12                            | -28.45                                   | 0.45                         | -1.63  | 27.5      | 27.1                     | 415                |
| KK_HP19   | Amer Valley        | 11/11/17 | -3.28                                       | 0.08                            | -29.78                                   | 0.17                         | -3.50  | 28.1      | 26.6                     | 394                |
| KK_HP03   | Amer Valley        | 11/16/17 | -3.36                                       | 0.16                            | -27.78                                   | 1.00                         | -0.92  | 26.9      | 22.7                     | 415                |
| KK_HP19   | Amer Valley        | 11/16/17 | -3.41                                       | 0.10                            | -29.06                                   | 0.64                         | -1.78  | 27.4      | 25.1                     | 394                |
| KK_HP19   | Amer Valley        | 12/1/17  | -3.42                                       | 0.01                            | -29.85                                   | 0.19                         | -2.49  | 27.5      | 25.1                     | 394                |
| KK_HP03   | Amer Valley        | 12/1/17  | -3.35                                       | 0.05                            | -28.34                                   | 0.52                         | -1.50  | 27.1      | 25.4                     | 415                |
| KK_HP03   | Amer Valley        | 12/7/17  | -3.29                                       | 0.02                            | -27.90                                   | 0.25                         | -1.60  | 26.1      | 21.7                     | 415                |
| KK_HP19   | Amer Valley        | 12/7/17  | -3.40                                       | 0.06                            | -29.96                                   | 0.56                         | -2.77  | 27.2      | 21.5                     | 394                |
| KK_HP23   | Amer Valley        | 10/13/17 | -3.31                                       | 0.08                            | -27.66                                   | 0.19                         | -1.14  | 28        | -                        | 383                |
| KK_HP03   | Amer Valley        | 10/10/18 | -2.60                                       | 0.06                            | -24.21                                   | 0.34                         | -3.40  | 27.9      | 30                       | 415                |
| PHED01    | Amer Plain         | 10/14/17 | -4.69                                       | 0.14                            | -32.34                                   | 0.55                         | 5.19   | 29.6      | 28.5                     | 394                |
| NKT_BW01  | Amer Plain         | 10/10/17 | -3.38                                       | 0.04                            | -28.44                                   | 0.06                         | -1.41  | 28        | -                        | 384                |
| NKT_BW09  | Amer Plain         | 10/10/17 | -4.38                                       | 0.05                            | -32.93                                   | 0.13                         | 2.14   | 29        | -                        | 382                |
| NKT_BW15  | Amer Plain         | 10/10/17 | -3.38                                       | 0.04                            | -28.37                                   | 0.43                         | -1.35  | 28        | -                        | 392                |
| KK_HP20   | Amer Plain         | 10/14/17 | -3.90                                       | 0.08                            | -29.46                                   | 0.23                         | 1.72   | 28        | -                        | 399                |
| PHED03    | Amer Plain         | 10/14/17 | -2.75                                       | 0.03                            | -23.35                                   | 0.23                         | -1.33  | 28        | -                        | 383                |
| KK_BW09   | Amer Plain         | 10/14/17 | -3.27                                       | 0.05                            | -26.70                                   | 0.26                         | -0.53  | 29        | -                        | 388                |
| NKT_BW01  | Amer Plain         | 11/8/16  | -3.54                                       | 0.05                            | -28.61                                   | 0.18                         | -0.32  | 27.9      | -                        | 384                |
| NKT_BW06  | Amer Plain         | 11/9/16  | -4.00                                       | 0.07                            | -31.40                                   | 0.22                         | 0.59   | 27.8      | -                        | 380                |
| NKT_BW15  | Amer Plain         | 11/9/16  | -3.34                                       | 0.09                            | -28.06                                   | 0.12                         | -1.31  | 27.7      | -                        | 392                |
| NKT_BW01  | Amer Plain         | 11/12/16 | -3.55                                       | 0.03                            | -29.17                                   | 0.24                         | -0.80  | 26.3      | -                        | 384                |
| NKT_BW41  | NKT North          | 10/12/17 | -3.11                                       | 0.05                            | -27.33                                   | 0.16                         | -2.45  | 29.4      | 28.3                     | 385                |
| NKT_BW41  | NKT North          | 12/24/17 | -3.23                                       | 0.06                            | -27.40                                   | 0.53                         | -1.52  | 27.6      | 23.5                     | 385                |
| NKT_BW41  | NKT North          | 11/8/16  | -3.26                                       | 0.03                            | -27.37                                   | 0.13                         | -1.33  | 27.6      | -                        | 385                |
| NKT_BW41  | NKT North          | 11/20/17 | -3.26                                       | 0.04                            | -27.38                                   | 0.14                         | -1.32  | -         | -                        | 385                |
| NKT_BW03  | NKT West           | 10/9/17  | -3.39                                       | 0.12                            | -28.54                                   | 0.76                         | -1.40  | 29.7      | 33.1                     | 374                |
| NKT_BW47  | NKT West           | 10/10/17 | -3.28                                       | 0.13                            | -28.13                                   | 0.51                         | -1.87  | 28.4      | 26.8                     | 379                |
| NKT_HPO4  | NKT West           | 10/9/17  | -3.23                                       | 0.09                            | -27.08                                   | 0.37                         | -1.24  | 27        | -                        | 382                |
| NKT_HPO1  | NKT West           | 10/9/17  | -4.30                                       | 0.06                            | -32.80                                   | 0.12                         | 1.58   | 28        | -                        | 388                |
| NKT_BW13  | NKT West           | 10/9/17  | -3.88                                       | 0.05                            | -31.09                                   | 0.17                         | -0.06  | 29        | -                        | 384                |
| NKT_BW49  | NKT West           | 10/9/17  | -4.33                                       | 0.09                            | -32.58                                   | 0.34                         | 2.03   | 29        | -                        | 381                |
| NKT_HPO4  | NKT West           | 11/8/16  | -3.29                                       | 0.11                            | -26.88                                   | 0.11                         | -0.57  | 28.8      | -                        | 382                |
| NKT_BW03  | NKT West           | 11/8/16  | -4.61                                       | 0.04                            | -33.59                                   | 0.21                         | 3.27   | 30.8      | -                        | 374                |
| NKT_BW03  | NKT West           | 11/9/16  | -3.39                                       | 0.13                            | -28.71                                   | 0.16                         | -1.59  | 27.8      | -                        | 374                |
| NKT_BW49  | NKT West           | 11/9/16  | -4.37                                       | 0.05                            | -32.89                                   | 0.16                         | 2.03   | 29.2      | -                        | 381                |
| NKT_BW13  | NKT West           | 11/9/16  | -3.79                                       | 0.04                            | -30.22                                   | 0.10                         | 0.08   | 28.1      | -                        | 384                |
| KK_LAKE02 | Historic Reservoir | 8/24/17  | 5.78                                        | 0.14                            | 19.44                                    | 0.67                         | -26.80 | -         | -                        | 430                |
| KK_LAKE03 | Historic Reservoir | 8/24/17  | 5.85                                        | 0.23                            | 15.85                                    | 1.01                         | -30.93 | 29.6      | 28.7                     | 465                |
| KK_LAKE02 | Historic Reservoir | 8/31/17  | 3.65                                        | 0.17                            | 9.61                                     | 0.35                         | -19.61 | 27.9      | 27.6                     | 430                |
| KK_LAKE03 | Historic Reservoir | 8/31/17  | 4.78                                        | 0.07                            | 11.62                                    | 0.45                         | -26.64 | 28.4      | 27.6                     | 465                |
| KK_LAKE02 | Historic Reservoir | 9/7/17   | 3.40                                        | 0.11                            | 7.76                                     | 0.36                         | -19.47 | 28        | 27.5                     | 430                |
| KK_LAKE03 | Historic Reservoir | 9/7/17   | 4.65                                        | 0.05                            | 11.16                                    | 0.23                         | -26.02 | 28.1      | 26.6                     | 465                |
| KK_LAKE02 | Historic Reservoir | 9/14/17  | 3.69                                        | 0.09                            | 8.69                                     | 0.91                         | -20.84 | 28.8      | 27.7                     | 430                |
| KK_LAKE03 | Historic Reservoir | 9/14/17  | 4.98                                        | 0.05                            | 12.21                                    | 0.06                         | -27.59 | 28.7      | 27                       | 465                |

| Well ID        | Sub-group              | Date     | $\delta^{18}\text{O}_{\text{VSMOW}}$<br>[‰] | sd $\delta^{18}\text{O}$<br>[‰] | $\delta^2\text{H}_{\text{VSMOW}}$<br>[‰] | sd $\delta^2\text{H}$<br>[‰] | DE     | T<br>[°C] | T <sub>air</sub><br>[°C] | Altitude<br>[masl] |
|----------------|------------------------|----------|---------------------------------------------|---------------------------------|------------------------------------------|------------------------------|--------|-----------|--------------------------|--------------------|
| KK_LAKE02      | Historic Reservoir     | 9/22/17  | 4.00                                        | 0.10                            | 9.99                                     | 0.45                         | -22.03 | 27.2      | 27.5                     | 430                |
| KK_LAKE03      | Historic Reservoir     | 9/22/17  | 5.16                                        | 0.07                            | 12.66                                    | 0.21                         | -28.60 | 27.5      | 26.5                     | 465                |
| KK_LAKE02      | Historic Reservoir     | 9/29/17  | 4.20                                        | 0.10                            | 10.48                                    | 0.20                         | -23.10 | 26.5      | 26.6                     | 430                |
| KK_LAKE03      | Historic Reservoir     | 9/29/17  | 5.32                                        | 0.17                            | 13.17                                    | 0.64                         | -29.35 | 27.2      | 27.3                     | 465                |
| KK_LAKE02      | Historic Reservoir     | 10/12/17 | 4.71                                        | 0.23                            | 13.36                                    | 0.77                         | -24.31 | 25.3      | 24.1                     | 430                |
| KK_LAKE02      | Historic Reservoir     | 11/1/17  | 5.14                                        | 0.12                            | 15.83                                    | 0.55                         | -25.25 | 22.6      | 30.3                     | 430                |
| KK_LAKE03      | Historic Reservoir     | 11/2/17  | 6.74                                        | 0.07                            | 19.57                                    | 0.68                         | -34.32 | -         | -                        | 465                |
| KK_LAKE02      | Historic Reservoir     | 11/11/17 | 5.33                                        | 0.25                            | 16.91                                    | 0.31                         | -25.74 | 20.7      | 25.7                     | 430                |
| KK_LAKE03      | Historic Reservoir     | 11/11/17 | 6.90                                        | 0.05                            | 21.47                                    | 0.34                         | -33.75 | 22        | 25                       | 465                |
| KK_LAKE02      | Historic Reservoir     | 11/16/17 | 5.65                                        | 0.05                            | 16.60                                    | 0.44                         | -28.61 | 19.4      | 25.8                     | 430                |
| KK_LAKE03      | Historic Reservoir     | 11/16/17 | 7.21                                        | 0.09                            | 22.20                                    | 0.16                         | -35.50 | 20.3      | 24.1                     | 465                |
| KK_LAKE02      | Historic Reservoir     | 12/1/17  | 6.00                                        | 0.06                            | 18.35                                    | 0.69                         | -29.68 | 15.6      | 19.7                     | 430                |
| KK_LAKE02      | Historic Reservoir     | 12/7/17  | 6.07                                        | 0.05                            | 18.90                                    | 0.48                         | -29.65 | 20.7      | 25.6                     | 430                |
| KK_LAKE03      | Historic Reservoir     | 12/7/17  | 7.77                                        | 0.05                            | 24.53                                    | 0.53                         | -37.63 | 18.9      | 23.4                     | 465                |
| KK_LAKE02      | Historic Reservoir     | 10/10/18 | 0.00                                        | 0.03                            | -12.29                                   | 0.81                         | -12.31 | 23.7      | 29.5                     | 430                |
| KK_LAKE03      | Historic Reservoir     | 10/10/18 | 2.86                                        | 0.07                            | -0.28                                    | 0.50                         | -23.17 | 23.1      | 28.9                     | 465                |
| KK_LAKE01      | Taalaab                | 10/14/17 | 0.90                                        | 0.12                            | -10.20                                   | 0.54                         | -17.44 | 27.2      | 31.2                     | 394                |
| KK_LAKE01      | Taalaab                | 10/14/17 | 1.19                                        | 0.14                            | -8.91                                    | 0.21                         | -18.43 | 27.2      | 31.2                     | 394                |
| KK_LAKE01      | Taalaab                | 11/14/16 | 0.21                                        | 0.08                            | -16.54                                   | 0.08                         | -18.23 | 23.8      | -                        | 394                |
| KK_Nallah      | KK_Nallah              | 10/31/17 | -2.38                                       | 0.19                            | -22.86                                   | 0.68                         | -3.83  | 21.5      | -                        | -                  |
| KK_smallNallah | KK_Nallah              | 10/31/17 | -2.88                                       | 0.14                            | -25.64                                   | 0.31                         | -2.62  | -         | -                        | -                  |
| NKT_HP12       | Outlier (Amer Inflow)  | 12/23/17 | -5.39                                       | 0.08                            | -37.75                                   | 0.24                         | 5.41   | 27.6      | 24.7                     | 382                |
| NKT_HP12       | Outlier (Amer Inflow)  | 10/14/17 | -5.52                                       | 0.03                            | -38.01                                   | 0.41                         | 6.14   | 30        | -                        | 382                |
| KK_HP08        | Outlier (Amer Inflow)  | 10/10/18 | -5.84                                       | 0.03                            | -38.84                                   | 0.63                         | 7.91   | 30.3      | 35.7                     | 418                |
| NKT_HP12       | Outlier (Amer Inflow)  | 10/15/18 | -5.63                                       | 0.07                            | -37.38                                   | 0.14                         | 7.69   | 28.6      | -                        | 382                |
| KK_BW08        | Outlier (Amer Plain)   | 10/13/17 | -3.80                                       | 0.09                            | -28.03                                   | 0.81                         | 2.34   | 29.3      | 30.9                     | 387                |
| NKT_DW02       | Outlier (NKT Dug well) | 11/8/16  | -3.42                                       | 0.06                            | -27.88                                   | 0.11                         | -0.50  | 26.9      | -                        | 384                |
| NKT_DW02       | Outlier (NKT Dug well) | 11/12/16 | -3.31                                       | 0.06                            | -28.61                                   | 0.28                         | -2.11  | 26.8      | -                        | 384                |
| KK_HP26        | KK_HP26                | 10/10/18 | 5.73                                        | 0.06                            | 17.31                                    | 0.52                         | -28.57 | 26.7      | 25.6                     | 429                |
| Rain           | Rain                   | 1/26/17  | -4.84                                       | 0.04                            | -22.47                                   | 0.21                         | 16.21  | -         | -                        | -                  |
| Rain           | Rain                   | 1/26/17  | -1.60                                       | 0.05                            | 0.28                                     | 0.10                         | 13.10  | -         | -                        | -                  |
| Rain           | Rain                   | 1/26/17  | -0.75                                       | 0.06                            | 3.81                                     | 0.28                         | 9.80   | -         | -                        | -                  |
| Rain           | Rain                   | 3/10/17  | 2.35                                        | 0.06                            | 34.11                                    | 0.18                         | 15.34  | -         | -                        | -                  |
| Rain           | Rain                   | 7/29/17  | -14.12                                      | 0.03                            | -102.11                                  | 0.23                         | 10.84  | -         | -                        | -                  |
| Rain           | Rain                   | 7/29/17  | -14.14                                      | 0.04                            | -101.11                                  | 0.60                         | 12.02  | -         | -                        | -                  |
| Rain           | Rain                   | 7/29/17  | -14.16                                      | 0.07                            | -102.22                                  | 0.26                         | 11.03  | -         | -                        | -                  |
| Rain           | Rain                   | 8/31/17  | -12.83                                      | 0.03                            | -91.13                                   | 0.21                         | 11.48  | -         | -                        | -                  |
| Rain           | Rain                   | 9/6/17   | -1.71                                       | 0.11                            | -7.53                                    | 0.34                         | 6.17   | -         | -                        | -                  |
| Rain           | Rain                   | 9/12/17  | 1.48                                        | 0.11                            | 13.80                                    | 0.32                         | 1.97   | -         | -                        | -                  |
| Rain           | Rain                   | 9/13/17  | -0.29                                       | 0.23                            | 8.70                                     | 0.52                         | 11.03  | -         | -                        | -                  |
| Rain           | Rain                   | 12/11/17 | 1.23                                        | 0.06                            | 12.4                                     | 0.29                         | 2.55   | -         | -                        | -                  |

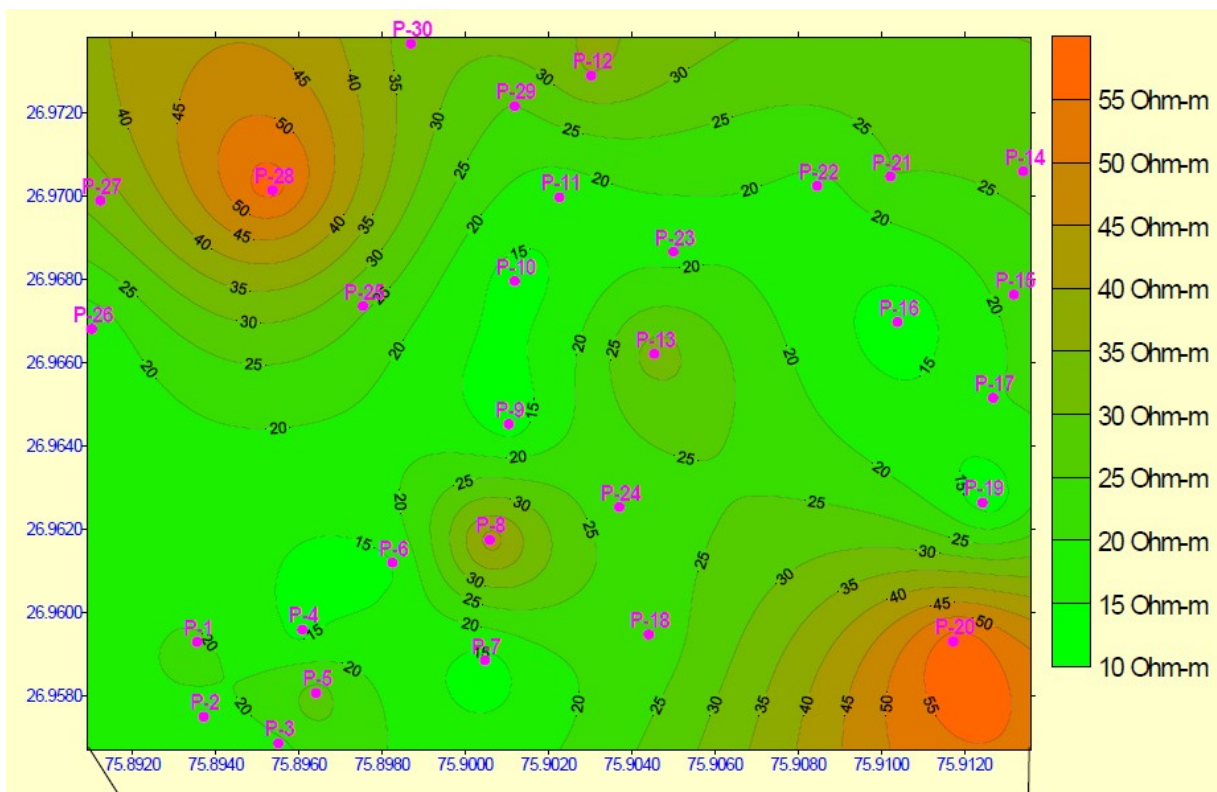

**Fig. S1** ISO resistivity section at 20 m depth. Purple points show locations of geoelectrical resistivity soundings.

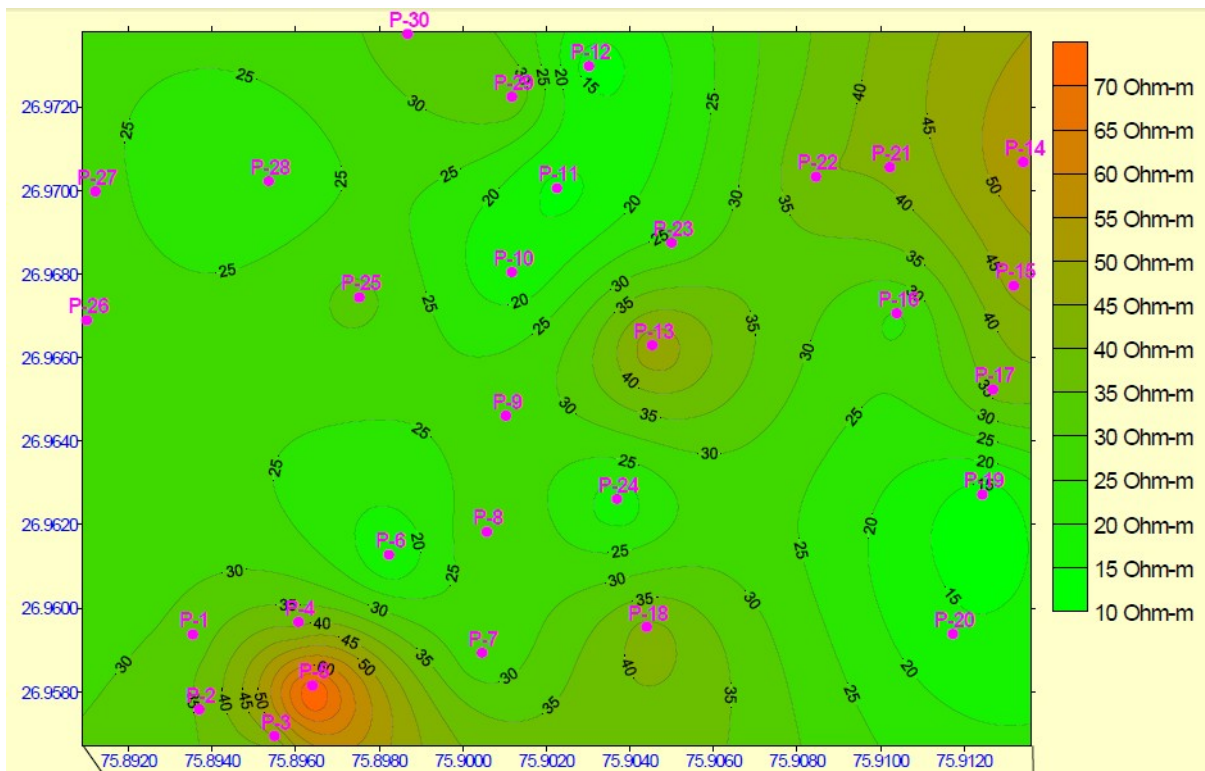

**Fig. S2** ISO resistivity section at 40 m depth. Purple points show locations of geoelectrical resistivity soundings. Attention: Scale is different to 20 m section.

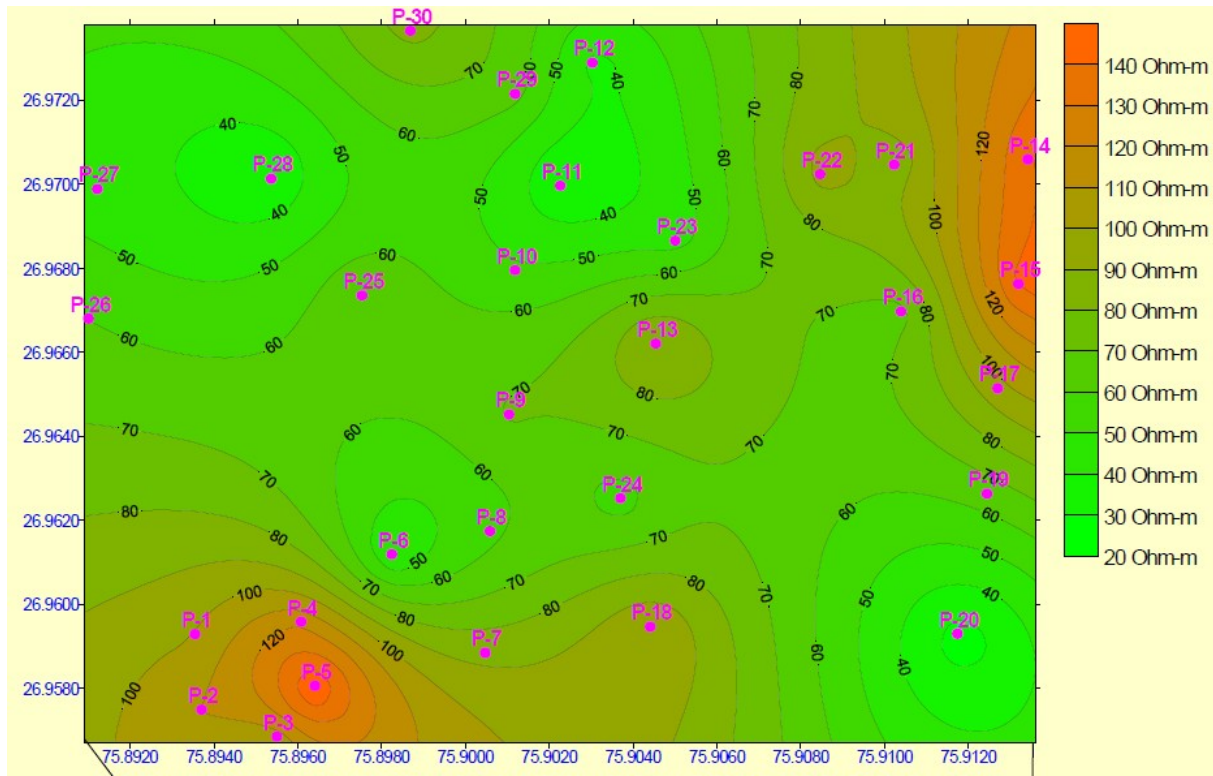

**Fig. S3** ISO resistivity section at 60 m depth. Purple points show locations of geoelectrical resistivity soundings. Attention: Scale is different to 20 and 40 m section.

**Table S4** Depth to water measurements.

| Well ID  | Date     | Longitude | Latitude  | Altitude GPS<br>[masl] | Water Table<br>[masl] | Depth to Water<br>[m] | Altitude DGPS<br>[masl] |
|----------|----------|-----------|-----------|------------------------|-----------------------|-----------------------|-------------------------|
| KK_DW01  | 7/5/15   | 75,862117 | 26,990117 | 405                    |                       |                       | 397,172                 |
| KK_DW06  | 7/5/15   | 75,850450 | 26,992417 | 436                    |                       |                       |                         |
| KK_DW01  | 9/26/15  | 75,862117 | 26,990117 | 405                    |                       |                       | 397,172                 |
| KK_DW02  | 9/26/15  | 75,860133 | 26,989317 | 404                    | 390                   | 14                    | 399,272                 |
| KK_DW06  | 9/26/15  | 75,850450 | 26,992417 | 436                    | 424                   | 12                    |                         |
| KK_OBS03 | 9/26/15  | 75,850450 | 26,992417 | 436                    |                       |                       |                         |
| KK_SW03  | 10/19/16 | 75,862317 | 26,985833 | 410                    | 399                   | 11                    | 395,872                 |
| KK_DW03  | 10/19/16 | 75,856333 | 26,988733 | 415                    | 403                   | 12                    | 404,574                 |
| KK_DW09  | 10/19/16 | 75,854400 | 26,986850 | 421                    |                       |                       | 408,587                 |
| KK_DW04  | 10/19/16 | 75,851483 | 26,990617 | 414                    |                       |                       | 413,699                 |
| KK_DW08  | 10/19/16 | 75,851533 | 26,989283 | 432                    |                       |                       | 415,360                 |
| KK_BW06  | 10/19/16 | 75,850633 | 26,992267 | 423                    | 413                   | 10                    |                         |
| KK_DW05  | 10/19/16 | 75,851117 | 26,991050 | 422                    | 412                   | 10                    |                         |
| KK_DW06  | 10/19/16 | 75,850450 | 26,992417 | 436                    | 424                   | 12                    |                         |
| KK_DW07  | 10/19/16 | 75,850733 | 26,989117 | 428                    |                       |                       |                         |
| KK_SW01  | 10/19/16 | 75,851117 | 26,991050 | 422                    |                       |                       |                         |
| KK_SW02  | 10/19/16 | 75,859633 | 26,987633 | 418                    |                       |                       |                         |
| NKT_BW13 | 10/25/16 | 75,901933 | 26,960333 | 384                    | 358                   | 26                    |                         |
| NKT_DW02 | 10/25/16 | 75,900917 | 26,968700 | 384                    | 350                   | 34                    |                         |
| KK_DW10  | 10/26/16 | 75,862967 | 26,985700 | 405                    | 394                   | 11                    |                         |
| KK_DW11  | 10/26/16 | 75,861900 | 26,986917 | 404                    | 393                   | 11                    |                         |
| KK_OBS01 | 10/26/16 | 75,863033 | 26,985100 | 406                    | 395                   | 11                    |                         |
| NKT_BW16 | 11/4/16  | 75,902267 | 26,965317 | 386                    | 359                   | 27                    |                         |
| KK_SW03  | 11/16/16 | 75,862317 | 26,985833 | 410                    | 398                   | 12                    | 395,872                 |
| KK_DW12  | 11/16/16 | 75,861350 | 26,988900 | 401                    | 389                   | 12                    | 397,056                 |
| KK_DW01  | 11/16/16 | 75,862117 | 26,990117 | 405                    | 392                   | 13                    | 397,172                 |
| KK_DW01  | 12/3/16  | 75,862117 | 26,990117 | 405                    | 391                   | 14                    | 397,172                 |
| KK_DW09  | 12/6/16  | 75,854400 | 26,986850 | 421                    | 410                   | 11                    | 408,587                 |
| KK_DW04  | 12/6/16  | 75,851483 | 26,990617 | 414                    |                       |                       | 413,699                 |
| KK_DW07  | 12/6/16  | 75,850733 | 26,989117 | 428                    |                       |                       |                         |
| KK_DW09  | 12/16/16 | 75,854400 | 26,986850 | 421                    | 410                   | 11                    | 408,587                 |
| KK_DW04  | 12/16/16 | 75,851483 | 26,990617 | 414                    | 405                   | 9                     | 413,699                 |
| KK_DW08  | 12/16/16 | 75,851533 | 26,989283 | 432                    | 419                   | 13                    | 415,360                 |
| KK_BW06  | 12/16/16 | 75,850633 | 26,992267 | 423                    | 413                   | 10                    |                         |
| KK_DW05  | 12/16/16 | 75,851117 | 26,991050 | 422                    | 412                   | 10                    |                         |
| KK_DW06  | 12/16/16 | 75,850450 | 26,992417 | 436                    | 419                   | 17                    |                         |
| KK_DW07  | 12/16/16 | 75,850733 | 26,989117 | 428                    | 412                   | 16                    |                         |
| KK_DW17  | 12/16/16 | 75,864800 | 26,982600 | 408                    | 387                   | 21                    |                         |
| KK_OBS03 | 12/16/16 | 75,850450 | 26,992417 | 436                    |                       |                       |                         |
| KK_DW18  | 12/17/16 | 75,870933 | 26,991167 | 390                    | 373                   | 17                    | 389,132                 |
| KK_SW07  | 12/17/16 | 75,869217 | 26,989117 | 393                    | 374                   | 19                    | 391,495                 |
| KK_DW19  | 12/17/16 | 75,871567 | 26,990917 | 400                    | 382                   | 18                    |                         |
| KK_DW20  | 12/17/16 | 75,869750 | 26,988917 | 393                    | 375                   | 18                    |                         |

| Well ID  | Date     | Longitude | Latitude  | Altitude GPS [masl] | Water Table [masl] | Depth to Water [m] | Altitude DGPS [masl] |
|----------|----------|-----------|-----------|---------------------|--------------------|--------------------|----------------------|
| KK_DW22  | 12/22/16 | 75,865667 | 26,995167 | 405                 | 390                | 15                 | 391,556              |
| KK_DW21  | 12/22/16 | 75,864433 | 26,992150 | 403                 | 387                | 16                 |                      |
| KK_DW12  | 12/27/16 | 75,861350 | 26,988900 | 401                 | 390                | 11                 | 397,056              |
| KK_HP18  | 12/27/16 | 75,862500 | 26,990533 | 408                 | 389                | 19                 | 397,663              |
| KK_DW13  | 12/27/16 | 75,862817 | 26,992300 | 408                 | 389                | 19                 | 402,221              |
| KK_HP12  | 12/27/16 | 75,861867 | 26,991917 | 410                 | 377                | 33                 | 406,269              |
| KK_OBS02 | 12/28/16 | 75,873467 | 26,992033 | 408                 | 390                | 18                 | 388,511              |
| KK_DW02  | 12/28/16 | 75,860133 | 26,989317 | 404                 | 392                | 12                 | 399,272              |
| KK_DW10  | 12/28/16 | 75,862967 | 26,985700 | 405                 | 391                | 14                 |                      |
| KK_SW05  | 12/30/16 | 75,866133 | 26,979800 | 391                 | 369                | 22                 | 389,583              |
| KK_DW25  | 12/30/16 | 75,871500 | 26,975100 | 393                 | 374                | 19                 |                      |
| NKT_BW02 | 1/19/17  | 75,900917 | 26,963733 | 380                 | 356                | 24                 |                      |
| KK_OBS02 | 2/25/17  | 75,873467 | 26,992033 | 408                 |                    |                    | 388,511              |
| KK_DW18  | 2/25/17  | 75,870933 | 26,991167 | 390                 | 372                | 18                 | 389,132              |
| KK_DW22  | 2/25/17  | 75,865667 | 26,995167 | 405                 | 389                | 16                 | 391,556              |
| KK_DW12  | 2/25/17  | 75,861350 | 26,988900 | 401                 | 390                | 11                 | 397,056              |
| KK_DW01  | 2/25/17  | 75,862117 | 26,990117 | 405                 | 391                | 14                 | 397,172              |
| KK_DW02  | 2/25/17  | 75,860133 | 26,989317 | 404                 | 392                | 12                 | 399,272              |
| KK_DW13  | 2/25/17  | 75,862817 | 26,992300 | 408                 | 389                | 19                 | 402,221              |
| KK_DW03  | 2/25/17  | 75,856333 | 26,988733 | 415                 | 403                | 12                 | 404,574              |
| KK_DW09  | 2/25/17  | 75,854400 | 26,986850 | 421                 | 410                | 11                 | 408,587              |
| KK_DW04  | 2/25/17  | 75,851483 | 26,990617 | 414                 | 404                | 10                 | 413,699              |
| KK_DW08  | 2/25/17  | 75,851533 | 26,989283 | 432                 | 419                | 13                 | 415,360              |
| KK_DW05  | 2/25/17  | 75,851117 | 26,991050 | 422                 | 412                | 10                 |                      |
| KK_DW07  | 2/25/17  | 75,850733 | 26,989117 | 428                 | 412                | 16                 |                      |
| KK_DW19  | 2/25/17  | 75,871567 | 26,990917 | 400                 | 381                | 19                 |                      |
| KK_DW21  | 2/25/17  | 75,864433 | 26,992150 | 403                 | 385                | 18                 |                      |
| KK_DW30  | 2/26/17  | 75,870917 | 26,968383 | 391                 | 387                | 4                  | 380,351              |
| KK_DW29  | 2/26/17  | 75,868867 | 26,964817 | 387                 | 380                | 7                  | 381,926              |
| KK_DW28  | 2/26/17  | 75,867750 | 26,976400 | 394                 | 374                | 20                 | 385,896              |
| KK_SW05  | 2/26/17  | 75,866133 | 26,979800 | 391                 | 367                | 24                 | 389,583              |
| KK_SW07  | 2/26/17  | 75,869217 | 26,989117 | 393                 | 372                | 21                 | 391,495              |
| KK_SW04  | 2/26/17  | 75,866150 | 26,983133 | 407                 | 384                | 23                 | 391,731              |
| KK_SW03  | 2/26/17  | 75,862317 | 26,985833 | 410                 | 395                | 15                 | 395,872              |
| KK_DW11  | 2/26/17  | 75,861900 | 26,986917 | 404                 | 390                | 14                 |                      |
| KK_DW17  | 2/26/17  | 75,864800 | 26,982600 | 408                 | 385                | 23                 |                      |
| KK_DW20  | 2/26/17  | 75,869750 | 26,988917 | 393                 | 374                | 19                 |                      |
| KK_DW25  | 2/26/17  | 75,871500 | 26,975100 | 393                 | 372                | 21                 |                      |
| KK_SW06  | 2/26/17  | 75,863783 | 26,988900 | 401                 | 377                | 24                 |                      |
| KK_SW09  | 2/26/17  | 75,869317 | 26,965533 | 393                 | 386                | 7                  |                      |
| NKT_DW08 | 2/28/17  | 75,873950 | 26,974883 | 388                 | 368                | 20                 |                      |
| NKT_DW09 | 2/28/17  | 75,879067 | 26,977233 | 390                 | 370                | 20                 |                      |
| NKT_DW10 | 2/28/17  | 75,876683 | 26,972883 | 390                 | 374                | 16                 |                      |
| NKT_DW11 | 3/2/17   | 75,869833 | 26,961583 | 395                 | 391                | 4                  | 380,541              |

| Well ID  | Date    | Longitude | Latitude  | Altitude GPS [masl] | Water Table [masl] | Depth to Water [m] | Altitude DGPS [masl] |
|----------|---------|-----------|-----------|---------------------|--------------------|--------------------|----------------------|
| KK_DW36  | 3/2/17  | 75,870033 | 26,979100 | 398                 | 373                | 25                 | 387,051              |
| KK_DW31  | 3/2/17  | 75,864450 | 26,983717 | 400                 | 378                | 22                 |                      |
| KK_DW32  | 3/2/17  | 75,863533 | 26,984067 | 403                 | 382                | 21                 |                      |
| KK_DW33  | 3/2/17  | 75,864433 | 26,980750 | 399                 | 376                | 23                 |                      |
| KK_DW35  | 3/2/17  | 75,868800 | 26,980533 | 391                 | 367                | 24                 |                      |
| KK_DW37  | 3/2/17  | 75,869600 | 26,976183 | 398                 | 377                | 21                 |                      |
| NKT_DW12 | 3/2/17  | 75,882350 | 26,964417 | 376                 | 370                | 6                  |                      |
| NKT_DW20 | 3/4/17  | 75,892817 | 26,960383 | 376                 | 363                | 13                 | 369,735              |
| NKT_DW23 | 3/4/17  | 75,890333 | 26,953817 | 384                 | 361                | 23                 | 375,282              |
| NKT_DW19 | 3/4/17  | 75,879883 | 26,955100 | 386                 | 370                | 16                 | 377,003              |
| NKT_DW17 | 3/4/17  | 75,877067 | 26,950883 | 391                 | 372                | 19                 | 381,149              |
| KK_DW38  | 3/4/17  | 75,874900 | 26,991683 | 394                 | 374                | 20                 | 386,797              |
| NKT_DW14 | 3/4/17  | 75,875683 | 26,990800 | 389                 | 366                | 23                 |                      |
| NKT_DW21 | 3/4/17  | 75,896483 | 26,960050 | 400                 | 380                | 20                 |                      |
| NKT_DW22 | 3/4/17  | 75,888367 | 26,952517 | 386                 | 360                | 26                 |                      |
| NKT_DW24 | 3/4/17  | 75,887783 | 26,957900 | 382                 | 360                | 22                 |                      |
| KK_OBS02 | 4/7/17  | 75,873467 | 26,992033 | 408                 | 386                | 22                 | 388,511              |
| KK_DW29  | 4/18/17 | 75,868867 | 26,964817 | 387                 | 380                | 7                  | 381,926              |
| KK_DW28  | 4/18/17 | 75,867750 | 26,976400 | 394                 | 373                | 21                 | 385,896              |
| KK_SW05  | 4/18/17 | 75,866133 | 26,979800 | 391                 |                    |                    | 389,583              |
| KK_DW22  | 4/18/17 | 75,865667 | 26,995167 | 405                 |                    |                    | 391,556              |
| KK_SW04  | 4/18/17 | 75,866150 | 26,983133 | 407                 | 381                | 26                 | 391,731              |
| KK_SW03  | 4/18/17 | 75,862317 | 26,985833 | 410                 |                    |                    | 395,872              |
| KK_DW12  | 4/18/17 | 75,861350 | 26,988900 | 401                 | 388                | 13                 | 397,056              |
| KK_DW01  | 4/18/17 | 75,862117 | 26,990117 | 405                 | 388                | 17                 | 397,172              |
| KK_HP18  | 4/18/17 | 75,862500 | 26,990533 | 408                 | 384                | 24                 | 397,663              |
| KK_DW02  | 4/18/17 | 75,860133 | 26,989317 | 404                 | 390                | 14                 | 399,272              |
| KK_DW13  | 4/18/17 | 75,862817 | 26,992300 | 408                 |                    |                    | 402,221              |
| KK_DW03  | 4/18/17 | 75,856333 | 26,988733 | 415                 | 403                | 12                 | 404,574              |
| KK_HP12  | 4/18/17 | 75,861867 | 26,991917 | 410                 | 388                | 22                 | 406,269              |
| KK_DW09  | 4/18/17 | 75,854400 | 26,986850 | 421                 | 409                | 12                 | 408,587              |
| KK_DW04  | 4/18/17 | 75,851483 | 26,990617 | 414                 | 404                | 10                 | 413,699              |
| KK_DW08  | 4/18/17 | 75,851533 | 26,989283 | 432                 | 418                | 14                 | 415,360              |
| KK_DW05  | 4/18/17 | 75,851117 | 26,991050 | 422                 | 411                | 11                 |                      |
| KK_DW07  | 4/18/17 | 75,850733 | 26,989117 | 428                 | 411                | 17                 |                      |
| KK_DW11  | 4/18/17 | 75,861900 | 26,986917 | 404                 | 388                | 16                 |                      |
| KK_DW17  | 4/18/17 | 75,864800 | 26,982600 | 408                 |                    |                    |                      |
| KK_DW21  | 4/18/17 | 75,864433 | 26,992150 | 403                 |                    |                    |                      |
| KK_DW31  | 4/18/17 | 75,864450 | 26,983717 | 400                 |                    |                    |                      |
| KK_DW32  | 4/18/17 | 75,863533 | 26,984067 | 403                 | 380                | 23                 |                      |
| KK_DW33  | 4/18/17 | 75,864433 | 26,980750 | 399                 | 374                | 25                 |                      |
| KK_SW06  | 4/18/17 | 75,863783 | 26,988900 | 401                 |                    |                    |                      |
| KK_SW09  | 4/18/17 | 75,869317 | 26,965533 | 393                 | 384                | 9                  |                      |
| KK_DW30  | 4/19/17 | 75,870917 | 26,968383 | 391                 | 386                | 5                  | 380,351              |



| Well ID   | Date    | Longitude | Latitude  | Altitude GPS [masl] | Water Table [masl] | Depth to Water [m] | Altitude DGPS [masl] |
|-----------|---------|-----------|-----------|---------------------|--------------------|--------------------|----------------------|
| NKT_DW11  | 4/19/17 | 75,869833 | 26,961583 | 395                 | 391                | 4                  | 380,541              |
| KK_DW38   | 4/19/17 | 75,874900 | 26,991683 | 394                 | 372                | 22                 | 386,797              |
| KK_DW36   | 4/19/17 | 75,870033 | 26,979100 | 398                 | 372                | 26                 | 387,051              |
| KK_OBS02  | 4/19/17 | 75,873467 | 26,992033 | 408                 | 384                | 24                 | 388,511              |
| KK_DW18   | 4/19/17 | 75,870933 | 26,991167 | 390                 | 370                | 20                 | 389,132              |
| KK_SW07   | 4/19/17 | 75,869217 | 26,989117 | 393                 | 370                | 23                 | 391,495              |
| KK_DW19   | 4/19/17 | 75,871567 | 26,990917 | 400                 | 378                | 22                 |                      |
| KK_DW20   | 4/19/17 | 75,869750 | 26,988917 | 393                 | 370                | 23                 |                      |
| KK_DW25   | 4/19/17 | 75,871500 | 26,975100 | 393                 | 372                | 21                 |                      |
| KK_DW35   | 4/19/17 | 75,868800 | 26,980533 | 391                 |                    |                    |                      |
| KK_DW37   | 4/19/17 | 75,869600 | 26,976183 | 398                 |                    |                    |                      |
| KK_HP25   | 4/19/17 | 75,875383 | 26,984300 | 398                 |                    |                    |                      |
| NKT_DW08  | 4/19/17 | 75,873950 | 26,974883 | 388                 | 369                | 19                 |                      |
| NKT_DW14  | 4/19/17 | 75,875683 | 26,990800 | 389                 | 363                | 26                 |                      |
| NKT_HP10  | 4/19/17 | 75,875633 | 26,983350 | 389                 |                    |                    |                      |
| NKT_HP11  | 4/19/17 | 75,873650 | 26,979200 | 394                 | 370                | 24                 |                      |
| NKT_DW20  | 4/21/17 | 75,892817 | 26,960383 | 376                 | 363                | 13                 | 369,735              |
| NKT_DW26  | 4/21/17 | 75,883833 | 26,962317 | 379                 | 370                | 9                  | 374,300              |
| NKT_DW23  | 4/21/17 | 75,890333 | 26,953817 | 384                 | 360                | 24                 | 375,282              |
| NKT_DW19  | 4/21/17 | 75,879883 | 26,955100 | 386                 | 369                | 17                 | 377,003              |
| NKT_DW17  | 4/21/17 | 75,877067 | 26,950883 | 391                 | 375                | 16                 | 381,149              |
| NKT_DW25  | 4/21/17 | 75,882950 | 26,962967 | 382                 | 375                | 7                  |                      |
| KK_HP18   | 4/29/17 | 75,862500 | 26,990533 | 408                 | 382                | 26                 | 397,663              |
| NKT_DW30  | 5/7/17  | 75,891967 | 26,975700 | 386                 |                    |                    | 378,664              |
| KK_DW39   | 5/7/17  | 75,887117 | 27,034083 | 399                 | 386                | 13                 |                      |
| NKT_DW27  | 5/7/17  | 75,909033 | 27,021333 | 408                 |                    |                    |                      |
| NKT_DW28  | 5/7/17  | 75,906617 | 27,025533 | 411                 |                    |                    |                      |
| NKT_DW29  | 5/7/17  | 75,892000 | 27,024250 | 399                 |                    |                    |                      |
| NKT_DW31  | 5/9/17  | 75,919100 | 26,970983 | 374                 | 326                | 48                 |                      |
| NKT_DW32  | 5/9/17  | 75,919000 | 26,951900 | 373                 | 348                | 25                 |                      |
| NKT_HP07  | 5/11/17 | 75,903450 | 26,968167 | 388                 | 357                | 31                 | 373,629              |
| NKT_OBS01 | 5/11/17 | 75,890900 | 27,000267 | 381                 | 343                | 38                 | 379,502              |
| KK_DW12   | 7/15/17 | 75,861350 | 26,988900 | 401                 |                    |                    | 397,056              |
| KK_DW01   | 7/15/17 | 75,862117 | 26,990117 | 405                 |                    |                    | 397,172              |
| KK_HP18   | 7/15/17 | 75,862500 | 26,990533 | 408                 |                    |                    | 397,663              |
| KK_DW02   | 7/15/17 | 75,860133 | 26,989317 | 404                 |                    |                    | 399,272              |
| KK_DW03   | 7/15/17 | 75,856333 | 26,988733 | 415                 | 404                | 11                 | 404,574              |
| KK_DW09   | 7/15/17 | 75,854400 | 26,986850 | 421                 | 411                | 10                 | 408,587              |
| KK_DW04   | 7/15/17 | 75,851483 | 26,990617 | 414                 | 405                | 9                  | 413,699              |
| KK_DW08   | 7/15/17 | 75,851533 | 26,989283 | 432                 | 419                | 13                 | 415,360              |
| KK_DW05   | 7/15/17 | 75,851117 | 26,991050 | 422                 | 412                | 10                 |                      |
| KK_DW07   | 7/15/17 | 75,850733 | 26,989117 | 428                 | 411                | 17                 |                      |
| NKT_DW20  | 7/16/17 | 75,892817 | 26,960383 | 376                 | 363                | 13                 | 369,735              |
| NKT_DW26  | 7/16/17 | 75,883833 | 26,962317 | 379                 | 370                | 9                  | 374,300              |

| Well ID   | Date    | Longitude | Latitude  | Altitude GPS [masl] | Water Table [masl] | Depth to Water [m] | Altitude DGPS [masl] |
|-----------|---------|-----------|-----------|---------------------|--------------------|--------------------|----------------------|
| NKT_DW23  | 7/16/17 | 75,890333 | 26,953817 | 384                 | 361                | 23                 | 375,282              |
| NKT_DW19  | 7/16/17 | 75,879883 | 26,955100 | 386                 | 370                | 16                 | 377,003              |
| NKT_OBS01 | 7/16/17 | 75,890900 | 27,000267 | 381                 | 341                | 40                 | 379,502              |
| KK_DW30   | 7/16/17 | 75,870917 | 26,968383 | 391                 | 386                | 5                  | 380,351              |
| NKT_DW11  | 7/16/17 | 75,869833 | 26,961583 | 395                 | 392                | 3                  | 380,541              |
| NKT_DW17  | 7/16/17 | 75,877067 | 26,950883 | 391                 | 375                | 16                 | 381,149              |
| KK_DW29   | 7/16/17 | 75,868867 | 26,964817 | 387                 | 380                | 7                  | 381,926              |
| KK_DW28   | 7/16/17 | 75,867750 | 26,976400 | 394                 | 372                | 22                 | 385,896              |
| KK_DW36   | 7/16/17 | 75,870033 | 26,979100 | 398                 | 371                | 27                 | 387,051              |
| KK_OBS02  | 7/16/17 | 75,873467 | 26,992033 | 408                 | 379                | 29                 | 388,511              |
| KK_DW18   | 7/16/17 | 75,870933 | 26,991167 | 390                 |                    |                    | 389,132              |
| KK_SW07   | 7/16/17 | 75,869217 | 26,989117 | 393                 |                    |                    | 391,495              |
| KK_SW04   | 7/16/17 | 75,866150 | 26,983133 | 407                 |                    |                    | 391,731              |
| KK_DW03   | 7/16/17 | 75,856333 | 26,988733 | 415                 | 404                | 11                 | 404,574              |
| KK_HP12   | 7/16/17 | 75,861867 | 26,991917 | 410                 | 380                | 30                 | 406,269              |
| KK_DW09   | 7/16/17 | 75,854400 | 26,986850 | 421                 | 411                | 10                 | 408,587              |
| KK_DW04   | 7/16/17 | 75,851483 | 26,990617 | 414                 | 404                | 10                 | 413,699              |
| KK_DW08   | 7/16/17 | 75,851533 | 26,989283 | 432                 | 419                | 13                 | 415,360              |
| KK_DW05   | 7/16/17 | 75,851117 | 26,991050 | 422                 | 412                | 10                 |                      |
| KK_DW06   | 7/16/17 | 75,850450 | 26,992417 | 436                 | 422                | 14                 |                      |
| KK_DW11   | 7/16/17 | 75,861900 | 26,986917 | 404                 |                    |                    |                      |
| KK_DW25   | 7/16/17 | 75,871500 | 26,975100 | 393                 | 371                | 22                 |                      |
| KK_DW33   | 7/16/17 | 75,864433 | 26,980750 | 399                 | 374                | 25                 |                      |
| KK_SW09   | 7/16/17 | 75,869317 | 26,965533 | 393                 | 386                | 7                  |                      |
| NKT_DW02  | 7/16/17 | 75,900917 | 26,968700 | 384                 | 352                | 32                 |                      |
| NKT_DW08  | 7/16/17 | 75,873950 | 26,974883 | 388                 | 368                | 20                 |                      |
| NKT_DW12  | 7/16/17 | 75,882350 | 26,964417 | 376                 |                    |                    |                      |
| NKT_DW32  | 7/16/17 | 75,919000 | 26,951900 | 373                 | 347                | 26                 |                      |
| NKT_OBS01 | 8/2/17  | 75,890900 | 27,000267 | 381                 | 341                | 40                 | 379,502              |
| KK_BW01   | 8/24/17 | 75,862217 | 26,990117 | 403                 | 362                | 41                 |                      |
| NKT_DW20  | 9/13/17 | 75,892817 | 26,960383 | 376                 | 363                | 13                 | 369,735              |
| NKT_HP07  | 9/13/17 | 75,903450 | 26,968167 | 388                 | 357                | 31                 | 373,629              |
| NKT_DW26  | 9/13/17 | 75,883833 | 26,962317 | 379                 | 371                | 8                  | 374,300              |
| NKT_DW23  | 9/13/17 | 75,890333 | 26,953817 | 384                 | 361                | 23                 | 375,282              |
| NKT_DW19  | 9/13/17 | 75,879883 | 26,955100 | 386                 | 372                | 14                 | 377,003              |
| NKT_DW30  | 9/13/17 | 75,891967 | 26,975700 | 386                 |                    |                    | 378,664              |
| NKT_DW11  | 9/13/17 | 75,869833 | 26,961583 | 395                 | 392                | 3                  | 380,541              |
| NKT_DW17  | 9/13/17 | 75,877067 | 26,950883 | 391                 | 376                | 15                 | 381,149              |
| NKT_DW02  | 9/13/17 | 75,900917 | 26,968700 | 384                 | 353                | 31                 |                      |
| NKT_DW31  | 9/13/17 | 75,919100 | 26,970983 | 374                 | 327                | 47                 |                      |
| NKT_DW32  | 9/13/17 | 75,919000 | 26,951900 | 373                 | 347                | 26                 |                      |
| NKT_OBS02 | 9/13/17 | 75,897017 | 26,969283 | 372                 | 342                | 30                 |                      |
| KK_OBS02  | 9/14/17 | 75,873467 | 26,992033 | 408                 | 383                | 25                 | 388,511              |
| KK_DW12   | 9/14/17 | 75,861350 | 26,988900 | 401                 | 388                | 13                 | 397,056              |

| Well ID   | Date     | Longitude | Latitude  | Altitude GPS<br>[masl] | Water Table<br>[masl] | Depth to Water<br>[m] | Altitude DGPS<br>[masl] |
|-----------|----------|-----------|-----------|------------------------|-----------------------|-----------------------|-------------------------|
| KK_DW01   | 9/14/17  | 75,862117 | 26,990117 | 405                    | 384                   | 21                    | 397,172                 |
| KK_DW02   | 9/14/17  | 75,860133 | 26,989317 | 404                    | 392                   | 12                    | 399,272                 |
| KK_DW13   | 9/14/17  | 75,862817 | 26,992300 | 408                    |                       |                       | 402,221                 |
| KK_DW03   | 9/14/17  | 75,856333 | 26,988733 | 415                    | 404                   | 11                    | 404,574                 |
| KK_HP12   | 9/14/17  | 75,861867 | 26,991917 | 410                    | 386                   | 24                    | 406,269                 |
| KK_DW09   | 9/14/17  | 75,854400 | 26,986850 | 421                    | 411                   | 10                    | 408,587                 |
| KK_DW04   | 9/14/17  | 75,851483 | 26,990617 | 414                    | 406                   | 8                     | 413,699                 |
| KK_DW08   | 9/14/17  | 75,851533 | 26,989283 | 432                    | 419                   | 13                    | 415,360                 |
| KK_BW01   | 9/14/17  | 75,862217 | 26,990117 | 403                    | 379                   | 24                    |                         |
| KK_DW05   | 9/14/17  | 75,851117 | 26,991050 | 422                    | 411                   | 11                    |                         |
| NKT_OBS01 | 9/15/17  | 75,890900 | 27,000267 | 381                    | 342                   | 39                    | 379,502                 |
| KK_DW30   | 9/15/17  | 75,870917 | 26,968383 | 391                    | 387                   | 4                     | 380,351                 |
| KK_DW29   | 9/15/17  | 75,868867 | 26,964817 | 387                    | 383                   | 4                     | 381,926                 |
| KK_DW28   | 9/15/17  | 75,867750 | 26,976400 | 394                    | 372                   | 22                    | 385,896                 |
| KK_DW38   | 9/15/17  | 75,874900 | 26,991683 | 394                    | 369                   | 25                    | 386,797                 |
| KK_DW36   | 9/15/17  | 75,870033 | 26,979100 | 398                    | 372                   | 26                    | 387,051                 |
| KK_DW18   | 9/15/17  | 75,870933 | 26,991167 | 390                    |                       |                       | 389,132                 |
| KK_SW05   | 9/15/17  | 75,866133 | 26,979800 | 391                    | 369                   | 22                    | 389,583                 |
| KK_SW07   | 9/15/17  | 75,869217 | 26,989117 | 393                    | 371                   | 22                    | 391,495                 |
| KK_DW22   | 9/15/17  | 75,865667 | 26,995167 | 405                    | 389                   | 16                    | 391,556                 |
| KK_SW04   | 9/15/17  | 75,866150 | 26,983133 | 407                    | 385                   | 22                    | 391,731                 |
| KK_SW03   | 9/15/17  | 75,862317 | 26,985833 | 410                    |                       |                       | 395,872                 |
| KK_DW10   | 9/15/17  | 75,862967 | 26,985700 | 405                    |                       |                       |                         |
| KK_DW11   | 9/15/17  | 75,861900 | 26,986917 | 404                    |                       |                       |                         |
| KK_DW17   | 9/15/17  | 75,864800 | 26,982600 | 408                    | 388                   | 20                    |                         |
| KK_DW19   | 9/15/17  | 75,871567 | 26,990917 | 400                    |                       |                       |                         |
| KK_DW20   | 9/15/17  | 75,869750 | 26,988917 | 393                    | 372                   | 21                    |                         |
| KK_DW21   | 9/15/17  | 75,864433 | 26,992150 | 403                    | 385                   | 18                    |                         |
| KK_DW25   | 9/15/17  | 75,871500 | 26,975100 | 393                    | 372                   | 21                    |                         |
| KK_DW32   | 9/15/17  | 75,863533 | 26,984067 | 403                    | 385                   | 18                    |                         |
| KK_DW33   | 9/15/17  | 75,864433 | 26,980750 | 399                    | 379                   | 20                    |                         |
| KK_DW35   | 9/15/17  | 75,868800 | 26,980533 | 391                    |                       |                       |                         |
| KK_DW37   | 9/15/17  | 75,869600 | 26,976183 | 398                    | 376                   | 22                    |                         |
| KK_SW06   | 9/15/17  | 75,863783 | 26,988900 | 401                    |                       |                       |                         |
| KK_SW09   | 9/15/17  | 75,869317 | 26,965533 | 393                    | 389                   | 4                     |                         |
| NKT_DW08  | 9/15/17  | 75,873950 | 26,974883 | 388                    | 369                   | 19                    |                         |
| KK_OBS02  | 10/18/17 | 75,873467 | 26,992033 | 408                    | 379                   | 29                    | 388,511                 |
| NKT_HP07  | 11/4/17  | 75,903450 | 26,968167 | 388                    | 357                   | 31                    | 373,629                 |
| NKT_BW06  | 11/4/17  | 75,897133 | 26,963567 | 380                    | 359                   | 21                    |                         |
| NKT_OBS02 | 11/4/17  | 75,897017 | 26,969283 | 372                    | 341                   | 31                    |                         |
| NKT_DW20  | 11/15/17 | 75,892817 | 26,960383 | 376                    | 362                   | 14                    | 369,735                 |
| NKT_DW26  | 11/15/17 | 75,883833 | 26,962317 | 379                    | 370                   | 9                     | 374,300                 |
| NKT_DW23  | 11/15/17 | 75,890333 | 26,953817 | 384                    | 361                   | 23                    | 375,282                 |
| NKT_DW19  | 11/15/17 | 75,879883 | 26,955100 | 386                    | 372                   | 14                    | 377,003                 |

| Well ID   | Date     | Longitude | Latitude  | Altitude GPS<br>[masl] | Water Table<br>[masl] | Depth to Water<br>[m] | Altitude DGPS<br>[masl] |
|-----------|----------|-----------|-----------|------------------------|-----------------------|-----------------------|-------------------------|
| NKT_DW11  | 11/15/17 | 75,869833 | 26,961583 | 395                    | 391                   | 4                     | 380,541                 |
| NKT_DW17  | 11/15/17 | 75,877067 | 26,950883 | 391                    | 377                   | 14                    | 381,149                 |
| KK_DW29   | 11/15/17 | 75,868867 | 26,964817 | 387                    | 380                   | 7                     | 381,926                 |
| KK_SW09   | 11/15/17 | 75,869317 | 26,965533 | 393                    | 387                   | 6                     |                         |
| NKT_DW02  | 11/15/17 | 75,900917 | 26,968700 | 384                    | 350                   | 34                    |                         |
| NKT_DW31  | 11/15/17 | 75,919100 | 26,970983 | 374                    | 327                   | 47                    |                         |
| NKT_DW32  | 11/15/17 | 75,919000 | 26,951900 | 373                    | 347                   | 26                    |                         |
| KK_DW30   | 11/16/17 | 75,870917 | 26,968383 | 391                    | 387                   | 4                     | 380,351                 |
| KK_DW28   | 11/16/17 | 75,867750 | 26,976400 | 394                    | 372                   | 22                    | 385,896                 |
| KK_DW38   | 11/16/17 | 75,874900 | 26,991683 | 394                    | 366                   | 28                    | 386,797                 |
| KK_DW36   | 11/16/17 | 75,870033 | 26,979100 | 398                    | 372                   | 26                    | 387,051                 |
| KK_OBS02  | 11/16/17 | 75,873467 | 26,992033 | 408                    | 379                   | 29                    | 388,511                 |
| KK_DW18   | 11/16/17 | 75,870933 | 26,991167 | 390                    |                       |                       | 389,132                 |
| KK_SW05   | 11/16/17 | 75,866133 | 26,979800 | 391                    |                       |                       | 389,583                 |
| KK_SW07   | 11/16/17 | 75,869217 | 26,989117 | 393                    | 369                   | 24                    | 391,495                 |
| KK_DW22   | 11/16/17 | 75,865667 | 26,995167 | 405                    |                       |                       | 391,556                 |
| KK_SW04   | 11/16/17 | 75,866150 | 26,983133 | 407                    | 380                   | 27                    | 391,731                 |
| KK_DW12   | 11/16/17 | 75,861350 | 26,988900 | 401                    |                       |                       | 397,056                 |
| KK_DW01   | 11/16/17 | 75,862117 | 26,990117 | 405                    |                       |                       | 397,172                 |
| KK_DW02   | 11/16/17 | 75,860133 | 26,989317 | 404                    | 389                   | 15                    | 399,272                 |
| KK_DW13   | 11/16/17 | 75,862817 | 26,992300 | 408                    |                       |                       | 402,221                 |
| KK_DW03   | 11/16/17 | 75,856333 | 26,988733 | 415                    | 403                   | 12                    | 404,574                 |
| KK_HP12   | 11/16/17 | 75,861867 | 26,991917 | 410                    |                       |                       | 406,269                 |
| KK_DW09   | 11/16/17 | 75,854400 | 26,986850 | 421                    | 410                   | 11                    | 408,587                 |
| KK_DW04   | 11/16/17 | 75,851483 | 26,990617 | 414                    | 404                   | 10                    | 413,699                 |
| KK_DW08   | 11/16/17 | 75,851533 | 26,989283 | 432                    | 418                   | 14                    | 415,360                 |
| KK_BW01   | 11/16/17 | 75,862217 | 26,990117 | 403                    | 355                   | 48                    |                         |
| KK_DW05   | 11/16/17 | 75,851117 | 26,991050 | 422                    | 412                   | 10                    |                         |
| KK_DW17   | 11/16/17 | 75,864800 | 26,982600 | 408                    | 384                   | 24                    |                         |
| KK_DW19   | 11/16/17 | 75,871567 | 26,990917 | 400                    |                       |                       |                         |
| KK_DW21   | 11/16/17 | 75,864433 | 26,992150 | 403                    |                       |                       |                         |
| KK_DW25   | 11/16/17 | 75,871500 | 26,975100 | 393                    | 372                   | 21                    |                         |
| KK_DW32   | 11/16/17 | 75,863533 | 26,984067 | 403                    | 380                   | 23                    |                         |
| KK_DW33   | 11/16/17 | 75,864433 | 26,980750 | 399                    | 375                   | 24                    |                         |
| NKT_DW08  | 11/16/17 | 75,873950 | 26,974883 | 388                    | 368                   | 20                    |                         |
| KK_HP18   | 11/25/17 | 75,862500 | 26,990533 | 408                    | 360                   | 48                    | 397,663                 |
| NKT_OBS01 | 12/4/17  | 75,890900 | 27,000267 | 381                    | 341                   | 40                    | 379,502                 |
| NKT_HP07  | 12/14/17 | 75,903450 | 26,968167 | 388                    | 357                   | 31                    | 373,629                 |
| NKT_OBS02 | 12/14/17 | 75,897017 | 26,969283 | 372                    | 341                   | 31                    |                         |
| NKT_DW26  | 12/20/17 | 75,883833 | 26,962317 | 379                    | 370                   | 9                     | 374,300                 |
| NKT_DW11  | 12/20/17 | 75,869833 | 26,961583 | 395                    | 391                   | 4                     | 380,541                 |
| KK_DW29   | 12/20/17 | 75,868867 | 26,964817 | 387                    | 380                   | 7                     | 381,926                 |
| KK_SW09   | 12/20/17 | 75,869317 | 26,965533 | 393                    | 384                   | 9                     |                         |
| KK_DW02   | 12/21/17 | 75,860133 | 26,989317 | 404                    | 390                   | 14                    | 399,272                 |

| Well ID   | Date     | Longitude | Latitude  | Altitude GPS<br>[masl] | Water Table<br>[masl] | Depth to Water<br>[m] | Altitude DGPS<br>[masl] |
|-----------|----------|-----------|-----------|------------------------|-----------------------|-----------------------|-------------------------|
| KK_DW03   | 12/21/17 | 75,856333 | 26,988733 | 415                    | 403                   | 12                    | 404,574                 |
| KK_DW09   | 12/21/17 | 75,854400 | 26,986850 | 421                    | 410                   | 11                    | 408,587                 |
| KK_DW04   | 12/21/17 | 75,851483 | 26,990617 | 414                    | 404                   | 10                    | 413,699                 |
| KK_DW08   | 12/21/17 | 75,851533 | 26,989283 | 432                    | 418                   | 14                    | 415,360                 |
| KK_BW01   | 12/21/17 | 75,862217 | 26,990117 | 403                    |                       |                       |                         |
| KK_DW05   | 12/21/17 | 75,851117 | 26,991050 | 422                    | 412                   | 10                    |                         |
| KK_DW30   | 12/22/17 | 75,870917 | 26,968383 | 391                    | 387                   | 4                     | 380,351                 |
| KK_DW38   | 12/22/17 | 75,874900 | 26,991683 | 394                    |                       |                       | 386,797                 |
| KK_DW36   | 12/22/17 | 75,870033 | 26,979100 | 398                    | 372                   | 26                    | 387,051                 |
| KK_SW07   | 12/22/17 | 75,869217 | 26,989117 | 393                    |                       |                       | 391,495                 |
| KK_DW25   | 12/22/17 | 75,871500 | 26,975100 | 393                    | 372                   | 21                    |                         |
| NKT_DW08  | 12/22/17 | 75,873950 | 26,974883 | 388                    | 368                   | 20                    |                         |
| NKT_DW32  | 12/22/17 | 75,919000 | 26,951900 | 373                    | 347                   | 26                    |                         |
| NKT_DW20  | 12/23/17 | 75,892817 | 26,960383 | 376                    | 363                   | 13                    | 369,735                 |
| NKT_HP07  | 12/23/17 | 75,903450 | 26,968167 | 388                    | 357                   | 31                    | 373,629                 |
| NKT_DW23  | 12/23/17 | 75,890333 | 26,953817 | 384                    | 361                   | 23                    | 375,282                 |
| NKT_DW19  | 12/23/17 | 75,879883 | 26,955100 | 386                    | 372                   | 14                    | 377,003                 |
| NKT_OBS01 | 12/23/17 | 75,890900 | 27,000267 | 381                    | 340                   | 41                    | 379,502                 |
| NKT_DW17  | 12/23/17 | 75,877067 | 26,950883 | 391                    | 377                   | 14                    | 381,149                 |
| KK_DW28   | 12/23/17 | 75,867750 | 26,976400 | 394                    | 372                   | 22                    | 385,896                 |
| KK_OBS02  | 12/23/17 | 75,873467 | 26,992033 | 408                    | 380                   | 28                    | 388,511                 |
| KK_SW04   | 12/23/17 | 75,866150 | 26,983133 | 407                    |                       |                       | 391,731                 |
| KK_DW17   | 12/23/17 | 75,864800 | 26,982600 | 408                    |                       |                       |                         |
| KK_DW32   | 12/23/17 | 75,863533 | 26,984067 | 403                    |                       |                       |                         |
| KK_DW33   | 12/23/17 | 75,864433 | 26,980750 | 399                    | 374                   | 25                    |                         |
| NKT_DW02  | 12/23/17 | 75,900917 | 26,968700 | 384                    | 352                   | 32                    |                         |
| NKT_DW31  | 12/23/17 | 75,919100 | 26,970983 | 374                    | 326                   | 48                    |                         |
| NKT_OBS02 | 12/23/17 | 75,897017 | 26,969283 | 372                    | 341                   | 31                    |                         |
| KK_DW22   | 10/10/18 | 75,865667 | 26,995167 | 405                    | 389                   | 16                    | 391,556                 |
| KK_DW12   | 10/10/18 | 75,861350 | 26,988900 | 401                    | 388                   | 13                    | 397,056                 |
| KK_DW01   | 10/10/18 | 75,862117 | 26,990117 | 405                    | 383                   | 22                    | 397,172                 |
| KK_HP18   | 10/10/18 | 75,862500 | 26,990533 | 408                    | 365                   | 43                    | 397,663                 |
| KK_DW02   | 10/10/18 | 75,860133 | 26,989317 | 404                    | 392                   | 12                    | 399,272                 |
| KK_DW13   | 10/10/18 | 75,862817 | 26,992300 | 408                    |                       |                       | 402,221                 |
| KK_DW03   | 10/10/18 | 75,856333 | 26,988733 | 415                    | 404                   | 11                    | 404,574                 |
| KK_DW04   | 10/10/18 | 75,851483 | 26,990617 | 414                    | 404                   | 10                    | 413,699                 |
| KK_DW08   | 10/10/18 | 75,851533 | 26,989283 | 432                    | 422                   | 10                    | 415,360                 |
| KK_DW05   | 10/10/18 | 75,851117 | 26,991050 | 422                    | 412                   | 10                    |                         |
| KK_DW21   | 10/10/18 | 75,864433 | 26,992150 | 403                    | 385                   | 18                    |                         |
| KK_SW09   | 10/10/18 | 75,869317 | 26,965533 | 393                    | 382                   | 11                    |                         |
| NKT_DW20  | 10/11/18 | 75,892817 | 26,960383 | 376                    | 363                   | 13                    | 369,735                 |
| NKT_DW26  | 10/11/18 | 75,883833 | 26,962317 | 379                    | 371                   | 8                     | 374,300                 |
| NKT_DW23  | 10/11/18 | 75,890333 | 26,953817 | 384                    | 359                   | 25                    | 375,282                 |
| NKT_DW19  | 10/11/18 | 75,879883 | 26,955100 | 386                    | 372                   | 14                    | 377,003                 |

| Well ID   | Date     | Longitude | Latitude  | Altitude GPS [masl] | Water Table [masl] | Depth to Water [m] | Altitude DGPS [masl] |
|-----------|----------|-----------|-----------|---------------------|--------------------|--------------------|----------------------|
| KK_DW30   | 10/11/18 | 75,870917 | 26,968383 | 391                 | 387                | 4                  | 380,351              |
| NKT_DW11  | 10/11/18 | 75,869833 | 26,961583 | 395                 | 392                | 3                  | 380,541              |
| NKT_DW17  | 10/11/18 | 75,877067 | 26,950883 | 391                 | 377                | 14                 | 381,149              |
| KK_DW29   | 10/11/18 | 75,868867 | 26,964817 | 387                 | 378                | 9                  | 381,926              |
| KK_DW25   | 10/11/18 | 75,871500 | 26,975100 | 393                 | 371                | 22                 |                      |
| KK_SW09   | 10/11/18 | 75,869317 | 26,965533 | 393                 | 385                | 8                  |                      |
| NKT_DW02  | 10/11/18 | 75,900917 | 26,968700 | 384                 | 346                | 38                 |                      |
| NKT_DW08  | 10/11/18 | 75,873950 | 26,974883 | 388                 | 363                | 25                 |                      |
| NKT_DW31  | 10/11/18 | 75,919100 | 26,970983 | 374                 | 331                | 43                 |                      |
| NKT_DW32  | 10/11/18 | 75,919000 | 26,951900 | 373                 | 347                | 26                 |                      |
| NKT_OBS02 | 10/11/18 | 75,897017 | 26,969283 | 372                 |                    |                    |                      |
| NKT_OBS01 | 10/15/18 | 75,890900 | 27,000267 | 381                 |                    |                    | 379,502              |
| KK_DW28   | 10/15/18 | 75,867750 | 26,976400 | 394                 | 372                | 22                 | 385,896              |
| KK_DW38   | 10/15/18 | 75,874900 | 26,991683 | 394                 |                    |                    | 386,797              |
| KK_DW36   | 10/15/18 | 75,870033 | 26,979100 | 398                 | 371                | 27                 | 387,051              |
| KK_SW07   | 10/15/18 | 75,869217 | 26,989117 | 393                 | 369                | 24                 | 391,495              |
| KK_SW04   | 10/15/18 | 75,866150 | 26,983133 | 407                 | 383                | 24                 | 391,731              |
| KK_SW03   | 10/15/18 | 75,862317 | 26,985833 | 410                 | 388                | 22                 | 395,872              |
| KK_DW11   | 10/15/18 | 75,861900 | 26,986917 | 404                 |                    |                    |                      |
| KK_DW17   | 10/15/18 | 75,864800 | 26,982600 | 408                 | 388                | 20                 |                      |
| KK_DW32   | 10/15/18 | 75,863533 | 26,984067 | 403                 | 385                | 18                 |                      |
| KK_DW33   | 10/15/18 | 75,864433 | 26,980750 | 399                 | 379                | 20                 |                      |
| NKT_BW06  | 10/10/07 | 75,897133 | 26,963567 | 380                 | 359                | 21                 |                      |
